# 1 Supercharging carbohydrate-binding module alone enhances

## 2 endocellulase thermostability, binding, and activity on cellulosic biomass

3 Antonio DeChellis<sup>1</sup>, Bhargava Nemmaru<sup>1</sup>, Deanne Sammond<sup>2</sup>, Jenna Douglass<sup>1</sup>, Nivedita Patil<sup>1</sup>,  
4 Olivia Reste<sup>1</sup>, Shishir P. S. Chundawat<sup>1\*</sup>

5  
6 <sup>1</sup>Department of Chemical and Biochemical Engineering, Rutgers University, NJ, USA

7  
8 <sup>2</sup>National Renewable Energy Lab, Golden, Colorado 80401, USA

9  
10 \*Corresponding Author: Shishir P. S. Chundawat ([shishir.chundawat@rutgers.edu](mailto:shishir.chundawat@rutgers.edu))

### 11 ABSTRACT

12 Lignocellulosic biomass recalcitrance to enzymatic degradation necessitates high enzyme loadings  
13 incurring large processing costs for industrial-scale biofuels or biochemicals production.  
14 Manipulating surface charge interactions to minimize non-productive interactions between  
15 cellulolytic enzymes and plant cell wall components (e.g., lignin or cellulose) via protein  
16 supercharging has been hypothesized to improve biomass biodegradability, but with limited  
17 demonstrated success to date. Here we characterize the effect of introducing non-natural enzyme  
18 surface mutations and net charge on cellulosic biomass hydrolysis activity by designing a library  
19 of supercharged family-5 endoglucanase Cel5A and its native family-2a carbohydrate binding  
20 module (CBM) originally belonging to an industrially relevant thermophilic microbe *Thermobifida*  
21 *fusca*. A combinatorial library of 33 mutant constructs containing different CBM and Cel5A  
22 designs spanning a net charge range of -52 to 37 was computationally designed using Rosetta  
23 macromolecular modelling software. Activity for all mutants was rapidly characterized as soluble  
24 cell lysates and promising mutants (containing mutations either on the CBM, Cel5A catalytic  
25 domain, or both CBM and Cel5A domains) were then purified and systematically characterized.  
26 Surprisingly, often endocellulases with mutations on the CBM domain alone resulted in improved  
27 activity on cellulosic biomass, with three top-performing supercharged CBM mutants exhibiting  
28 between 2–5-fold increase in activity, compared to native enzyme, on both pretreated biomass  
29 enriched in lignin (i.e., corn stover) and isolated crystalline/amorphous cellulose. Furthermore, we  
30 were able to clearly demonstrate that endocellulase net charge can be selectively fine-tuned using  
31 protein supercharging protocol for targeting distinct substrates and maximizing biocatalytic  
32 activity. Additionally, several supercharged CBM containing endocellulases exhibited a 5–10 °C  
33 increase in optimal hydrolysis temperature, compared to native enzyme, which enabled further  
34 increase in hydrolytic yield at higher operational reaction temperatures. This study demonstrates  
35 the first successful implementation of enzyme supercharging of cellulolytic enzymes to increase  
36 hydrolytic activity towards complex lignocellulosic biomass derived substrates.

### 37 KEYWORDS

38 Carbohydrate-Binding Module, Cellulase, Cellulosic Biofuels, Computational Enzyme Design,  
39 Lignocellulose Hydrolysis, Protein Supercharging, *Thermobifida fusca*

## 1 INTRODUCTION

2 As demand for fossil-fuel based petroleum products and fuels continues to increase, global oil  
3 production is forecasted to reach its peak<sup>1</sup>. Resource scarcity and climate change exasperated by  
4 this petroleum dependance requires suitable sustainable energy sources in order to replace  
5 conventionally derived fuels and chemicals and promote a circular bioeconomy<sup>2-4</sup>. Bioethanol is  
6 one potential candidate to replace conventional fuels that can be produced from abundant carbon  
7 neutral renewable sources like biomass<sup>5,6</sup>. In order to become an economically feasible alternative  
8 energy that can compete with the price of fossil fuels, biorefineries must valorize lignocellulosic  
9 wastes into useful fuels and chemicals<sup>7,8</sup>. Lignocellulosic waste biomass is a readily abundant and  
10 underutilized resource<sup>9</sup> that can be derived from agricultural residues like corn stover or sugar cane  
11 bagasse, as well from woody forest products<sup>10</sup>. These substrates are rich in insoluble  
12 polysaccharides like cellulose and hemicellulose that form a tightly packed hydrogen bonded  
13 network within the secondary cell walls of plant masses buried within a layer of the structural  
14 polymer lignin<sup>11</sup>. These complex polysaccharides are subject to enzymatic saccharification to their  
15 fermentable monomers for biofuel production by Carbohydrate Active enZymes (CAZymes) that  
16 catalyze the hydrolysis of glycosidic linkages within glucan chains. There are numerous different  
17 CAZyme families with mechanistic differences and substrate specificities that can act  
18 synergistically to completely depolymerize the biomass complex<sup>12-15</sup>. However, this is an idealized  
19 scenario, and real-world biomass conversion to biofuels is inefficient due to limited technologies  
20 and processing challenges related to the substrate.

21 The economic viability of biofuel production from lignocellulosic biomass is significantly  
22 hindered by biomass' recalcitrance to enzymatic saccharification which is a large contributor to  
23 high processing costs<sup>16</sup>. The tight biomass structure within plant secondary cell walls provides  
24 limited access for enzymes to depolymerize cellulose and hemicellulose significantly reducing the  
25 ability to hydrolyze these polysaccharides<sup>17</sup>. Cellulose itself exists as insoluble crystalline  
26 microfibrils which poses a challenge for enzymes to catalyze hydrolysis at the solid-liquid  
27 interface<sup>16</sup>. Lignin is also known to contribute to biomass recalcitrance<sup>16,18</sup> through the irreversible  
28 non-productive binding CAZymes<sup>19</sup>. These factors greatly reduce the efficiency of enzymatic  
29 saccharification resulting in high enzyme loadings to supplement low activity and enzymes losses,  
30 which greatly increases the processing costs in biorefineries<sup>20</sup>. One solution to this issue is the  
31 introduction of biomass pretreatment prior to enzymatic saccharification in order to make cellulose  
32 and hemicellulose more accessible to CAZymes reducing overall recalcitrance<sup>21,22</sup>.  
33 Thermochemical pretreatment methods like steam explosion, ammonia fiber expansion (AFEX),  
34 and extractive ammonia (EA) are successful in disrupting the biomass matrix, and are even capable  
35 of converting the native cellulose-I into a more digestible allomorph significantly reducing  
36 recalcitrance<sup>23,24</sup>. However, non-productive binding remains a persistent issue as these methods do  
37 not totally remove lignin, and pretreatment does not do much to supplement low activity on  
38 crystalline cellulose<sup>16,25</sup>. Many of the pertinent CAZymes exist as multifunctional<sup>15</sup> and  
39 multimodular proteins containing a carbohydrate binding module (CBM) and catalytic domain  
40 (CD) linked through a flexible linker peptide<sup>26,27</sup>. One approach to overcome the limitations that  
41 persist from pretreatment alone is to utilize the rational design and engineering<sup>28</sup> of CBMs to  
42 modulate productive vs. non-productive binding interactions, as well as engineer CDs with higher  
43 catalytic activity.

44 Evidence suggests that there is significant surface charged interactions between lignin,  
45 cellulose, and CAZymes. Binding studies of different green fluorescent protein (GFP) mutants  
46 binding to lignin confirm a weak correlation between increasing positive net charge and greater

*DeChellis et al. Supercharging cellulases to enhance thermostability and catalytic activity*

1 irreversible binding to lignin. This relationship likely stems from electrostatic interactions between  
2 the slightly negative lignin surface and charged proteins<sup>29</sup>. Applying this principle to a family-5  
3 glycosyl hydrolase CelE CD appended to a family-3a CBM, Whitehead et al. (2017) were able to  
4 create lignin resistant cellulases<sup>30</sup>. Utilizing protein supercharging<sup>31</sup> to introduce aspartate and  
5 glutamate mutations in solvent exposed amino acid residues, the introduced negative surface  
6 charges successful reduced lignin inhibition at the expense of overall catalytic activity on  
7 amorphous phosphoric acid swollen cellulose (PASC)<sup>30</sup>. This result provides insight that surface  
8 charged interactions can indeed reduce binding to lignin but can also impact binding and  
9 subsequent hydrolysis of cellulose model substrates that carry a similar negative surface charge.  
10 This work provides promise in using protein surface supercharging for improving cellulose  
11 hydrolysis, but several questions still remain unknown. These include (i) what effect does positive  
12 supercharging have on both CBM and CD, (ii) how do supercharged cellulases behave on  
13 crystalline cellulose and biomass, and (iii) is there a specific net charge where catalytic turnover  
14 is maximized on different substrates. The last question also aligns with the Sabatier principle<sup>32</sup> that  
15 has been previously applied to cellulases<sup>33,34</sup> and suggests that intermediate binding interactions  
16 between substrate and enzyme provide optimal catalytic turnover. Applying this principle to  
17 supercharged enzymes, it may be possible to increase/decrease binding between enzyme and  
18 substrate by tweaking surface charged interactions so that at a critical net charge one would  
19 observe optimal catalytic turnover.

20 Here we build upon the knowledge of protein supercharging's effect on cellulose  
21 hydrolysis by supercharging a family-5 endocellulases Cel5A and its native family 2a CBM from  
22 the thermophilic microbe *Thermobifida fusca*<sup>35,36</sup>. Rosetta macromolecular software was used to  
23 supercharge both CBM2a and Cel5A CD for a total library of 33 mutants (including wild type full  
24 length enzyme) spanning a net charge range of -52 to 37. Mutant activity was screened first from  
25 soluble cell lysates, with those constructs that performed best targeted for large scale expression  
26 and purification. Purified enzyme assays identify a much greater contribution to activity  
27 improvements when the binding module alone was engineered compared to the CD. This result is  
28 likely linked to improved binding affinity for supercharged CBMs elucidated by GFP based pull  
29 down binding assays. Furthermore, hydrolysis assays screened at different solution pH identify  
30 some charge optima that exist on biomass and cellulose, as well as shifts in optimal pH for  
31 supercharged mutants. Through studying hydrolytic activity at elevated temperatures, positively  
32 supercharged mutants were found to exhibit an increased optimal hydrolysis temperature and  
33 resulting increase in hydrolytic yield on crystalline cellulose substrates. There are several mutants  
34 within this supercharged Cel5A library capable of improved catalytic activity compared to wild  
35 type enzymes with upwards of 2-fold improvements in activity.  
36

## 37 **EXPERIMENTAL SECTION**

38 **Reagents:** AFEX pretreated corn stover used for hydrolysis assays were prepared and provided  
39 by Dr. Rebecca Ong's lab (Michigan Technological University) following established protocols<sup>23</sup>.  
40 Crystalline cellulose-I was procured from Avicel (PH-101, Sigma-Aldrich), and was also used to  
41 prepare phosphoric acid swollen cellulose (PASC) from prior protocols<sup>37</sup>. Chromogenic para-  
42 nitrophenyl cellobioside (pNPC) was obtained from Biosynth. All genes used for expression of  
43 recombinant constructs were provided by the Department of Energy Joint Genome Institute (DOE-  
44 JGI). All other reagents used were purchased from either Sigma Aldrich or Fischer Scientific  
45 unless otherwise noted in subsequent sections.  
46

*DeChellis et al. Supercharging cellulases to enhance thermostability and catalytic activity*

1 **Computational design of mutant enzyme libraries and plasmid construction:** Protein  
2 supercharging was done by introducing either positive (K and R) or negative (D and E) amino  
3 acids on the surface of either CBM or CD using Rosetta macromolecular software. The structure  
4 of CBM2a from *T. fusca* has yet to be solved, thus CBM designs were based off of homology  
5 model constructed using Rosetta CM<sup>38</sup>. Supercharged designs for the Cel5A catalytic domain were  
6 constructed based off of solved crystal structure (PDB: 2CKR). In a previous study from our group,  
7 FoldIt interface was used to identify folding energy change caused due to mutations of individual  
8 residues<sup>30</sup>. However, this protocol is not amenable to automation when large mutant libraries are  
9 being designed. Hence, in this study, we utilized AvNAPSA (Asc)<sup>31</sup> and Rosetta supercharging  
10 (Rsc) protocols that have already been deployed in Rosetta software<sup>39</sup>. For a given domain  
11 (CBM2a or Cel5A) to achieve the extremes of net charge, positive and negative supercharging  
12 protocols were run without a target net charge to ensure that sampling by the software is unbiased  
13 by user input. Upon completion of the simulation, the output structure was analyzed in PyMOL to  
14 identify whether any amino acids chosen by the software were within 10 Å of the CBM2a binding  
15 site or Cel5A active site. In addition, the output structure was analyzed for mutations of helix  
16 capping residues and disruption of salt bridges formed between aspartate and arginine residues.  
17 Since these amino acid mutations may have deleterious impact on enzyme structure or activity,  
18 these residues were included in a resfile and the simulations were re-run with exclusion of these  
19 amino acids. Successive iterations of this simulation routine with constraints allowed us to get a  
20 better understanding of the net charge range that can be sampled without introducing deleterious  
21 mutations. The intent was to design 4 CBM2a mutants and 6 Cel5A mutants, to allow for enough  
22 diversity in the overall net charge range sampled. For each target net charge level, mutants from  
23 AvNAPSA and Rosetta supercharging protocols were included for the sake of redundancy.  
24 Nucleotide sequences for the final designs were codon optimized for *E. coli* and provided to the  
25 Joint Genome Institute (Department of Energy) to synthesize designed mutant sequences. Genes  
26 for each construct were subcloned between KpnI and XhoI restriction sites in the pET45b(+)  
27 expression vector ([www.addgene.org/vector-database/2607/](http://www.addgene.org/vector-database/2607/)). These genes were transformed into  
28 T7 SHuffle (New England Biolabs) competent *E. coli* cells and stored as 20% glycerol stocks to  
29 be used for enzyme expression described in subsequent sections.  
30

31 **Small scale protein expression:** Glycerol stocks for all CBM2a-Cel5A mutants and wild type full  
32 length enzyme were used to inoculate 10 mL of LB media with 100 µg/mL carbenicillin and grown  
33 overnight at 37°C, 200 RPM for 16 hours. Overnight cultures were used to make new glycerol  
34 stocks for large scale expression, and remaining inoculum was transferred to 200 mL of Studier's  
35 auto-induction medium<sup>40</sup> (TB+G) with 100 µg/mL carbenicillin. These cultures were incubated  
36 for an additional 6 hours at 37°C so that cells could once again reach an exponential growth phase,  
37 and protein expression was induced at two different temperatures, first 25 °C for 24 hours, then  
38 16 °C for 20 hours. Cells were pelleted via centrifugation with a Beckman Coulter centrifuge  
39 equipped with JA-14 rotor by spinning the entire 200 mL cultures down at 30,100 x g for 10 mins  
40 at 4 °C. For lysate characterization, 0.5g of cells were harvested from the main pellet and  
41 resuspended with 2.5 mL lysis buffer (20 mM phosphate buffer, 500 mM NaCl, and 20% (v/v)  
42 glycerol, pH 7.4), 35 µL protease inhibitor cocktail (1 µM E-64, Sigma Aldrich), and 2.5 µL  
43 lysozyme (Sigma Aldrich). Cells were sonicated using a Qsonica Q700 sonicator with 1/8"  
44 microtip probe for 1 minute (Amplitude = 20, pulse on time: 5 s, pulse off time: 30 s) on ice to  
45 avoid overheating. Insoluble cell debris were pelleted in an Eppendorf 5424 centrifuge with rotor



*DeChellis et al. Supercharging cellulases to enhance thermostability and catalytic activity*

1 FA-45-24-11 at 15,500 x g for 45 minutes. The soluble lysate supernatant was isolated for  
2 biochemical characterization.

3  
4 **Characterization of soluble cell lysates:** Isolated soluble cell lysate activity was characterized  
5 using chromogenic substrate pNPC, AFEX pretreated corn stover, cellulose-I, and PASC. Assays  
6 with pNPC were described previously<sup>30</sup>. Briefly, 75  $\mu$ L of 5 mM pNPC prepared in deionized (DI)  
7 water was added to 100  $\mu$ L of soluble cell lysate in 0.2 mL PCR tubes (USA Scientific). All  
8 reaction wells and reagents were held on ice to prevent premature reaction before incubation.  
9 Reaction wells were then incubated for 30 minutes at 50°C with 200 RPM orbital shaking. After  
10 incubating, reaction mixtures were quenched with 25  $\mu$ L of 0.4 M sodium hydroxide (NaOH) in  
11 order to arrest the reaction and increase the pH well above the pKa of 4-nitrophenol. After  
12 quenching, 100  $\mu$ L of reaction supernatant was transferred to a clear flat bottom 96-well microplate  
13 (USA Scientific), and endpoint absorbance of pNP (410 nm) was recorded and compared to pNP  
14 standards.

15 Insoluble cellulosic substrates used for hydrolysis assays were prepared as a slurry in  
16 deionized (DI) water with 0.2 g/L sodium azide to inhibit microbial contamination. AFEX  
17 pretreated corn stover was first milled to 0.5 mm before suspension in DI water at a concentration  
18 of 25 g/L, cellulose-I was prepared as a 100 g/L slurry in DI water using Avicel, and PASC was  
19 prepared as a 10 g/L slurry with DI water. Hydrolysis assays were conducted by adding 100  $\mu$ L of  
20 substrate slurry (AFEX, cellulose-I, or PASC) and 100  $\mu$ L of soluble cell lysate to a 0.2 mL 96-  
21 well round bottom microplate (Greiner Bio-One). Reaction blanks consisted of cell lysis buffer,  
22 protease inhibitor cocktail, and lysozyme were used in place of cell lysate. Microplates were sealed  
23 with TPE capmat-96 (Micronic) green plate seals and taped tightly with packing tape on all edges  
24 to prevent evaporation. Reaction wells were incubated for four hours at 60 °C in a VWR  
25 hybridization oven with end-over-end mixing at 5 RPM. This temperature was chosen based on  
26 prior work that found 60°C to be the optimal temperature for *T. fusca* cellulases<sup>41</sup>. Hydrolysis  
27 plates were incubated for only four hours as to capture activity prior to 5% total conversion.  
28 Concentration of reducing sugars in the soluble hydrolysate supernatant was estimated using  
29 dinitrosalicylic acid (DNS) assays<sup>42</sup> as previously described<sup>43</sup> and compared to glucose standards.  
30

31 **Construction of CBM2a-GFP constructs:** CBM2a-GFP constructs for select five CBMs used in  
32 this study were constructed via Gibson Assembly of the CBM with a green Fluorescent Protein  
33 (GFP) insert. In order to keep the architecture of the CBM2a-GFP constructs analogous to their  
34 CBM2a-Cel5A counterparts, GFP was fused on the C-terminus of the CBM via the same linker  
35 constant throughout all fusion proteins used in this study. Primers were designed to linearize the  
36 pET45-b(+) backbone containing both CBM and linker. Although the amino acid sequences are  
37 the same for the linker peptide used for all five CBMs, nucleotide sequences differ due to *E. coli*  
38 codon optimization mentioned in the previous section, thus five separate pairs of primers were  
39 constructed. Insert primers were designed based on GFP from a pEC-GFP-CBM1 DNA template  
40 used in previous studies<sup>44</sup>. All primers were synthesized by Integrated DNA Technologies, Inc  
41 (IDT) and PCR reactions were conducted following previously published protocols<sup>45</sup>. Remnant  
42 wild-type DNA was degraded via DPN1 (New England Biolabs) digestion for two hours at 37°C,  
43 and leftover DPN1 enzyme was deactivated by heating the digestion mixture to 80°C for 20  
44 minutes. The remaining PCR products were cleaned via spin columns from an IBI Scientific gel  
45 extraction & PCR cleanup kit following manufacturer's protocols. The final CBM-GFP constructs  
46 were assembled using NEBuilder® Hifi DNA Assembly (New England Biolabs) master mix

*DeChellis et al. Supercharging cellulases to enhance thermostability and catalytic activity*

1 following manufacturers protocols. The cloning mixture was transformed into NEB 5-alpha  
2 Competent *E. coli* cells, grown overnight on LB-agar plates at 37°C. Plate colonies were picked at  
3 random and used to inoculate 10mL LB media with 100 µg/mL carbenicillin in 15mL culture tubes  
4 (VWR). Cultures were once again grown overnight at 37°C, and cells were pelleted via  
5 centrifugation at 3,900 RPM in an Eppendorf 5810R centrifuge with rotor S-4-104. Plasmids were  
6 extracted using a high-speed miniprep kit (IBI Scientific), sequenced via Sanger sequencing  
7 (Azenta), and confirmed sequences were transformed into T7 SHuffle (New England Biolabs)  
8 competent *E. coli* cells for large scale expression and purification described in the next section.

9  
10 **Large scale protein production and purification:** Large scale expression of wild type and  
11 mutant constructs was done by scaling up protocols from small scale expression. Briefly, 50 mL  
12 LB medium and 100 µg/mL carbenicillin was inoculated with glycerol stocks (from small scale  
13 cultures) and incubated for 16 hours at 37 °C and 200 RPM. Starter cultures were then transferred  
14 to TB+G auto-induction medium and incubated for 6 hours at 37 °C before inducing protein  
15 expression at 25 °C for 24 hours then 16°C for 20 hours. Cell pellets were harvested via  
16 centrifugation in the same manner described earlier. Entire cell pellets were resuspended with  
17 15mL of cell lysis buffer, 200 µL of protease inhibitor cocktail, and 15 µL of lysozyme per every  
18 3 gram of cell pellets and were vortexed vigorously to evenly suspend the cells. Cells were lysed  
19 using a Qsonica Q700 sonicator equipped with a 1/4” microtip for 2.5 minutes (Amplitude = 20,  
20 pulse on time: 10s, pulse off time: 30s) on ice. Lysate mixtures were centrifuged at 4°C in an  
21 Eppendorf 5810R centrifuge to isolate soluble cell extract. An extra 500 µL of protease inhibitor  
22 cocktail was added to the lysates in order to prevent proteolytic cleavage prior to purification.  
23 CBM2a-Cel5A proteins were isolated from *E. coli* lysates by immobilized metal affinity  
24 chromatography (IMAC) using a BioRad NGC FPLC equipped with a His-trap FF Ni<sup>2+</sup> - NTA  
25 column (GE Healthcare). Columns were regenerated fresh with nickel prior to purification of each  
26 sample. Purification was done by first equilibrating the column and system plumbing with start  
27 buffer A (100 mM MOPS, 500 mM NaCl, 10 mM imidazole, pH 7.4) at a rate of 5 mL/min for  
28 roughly 5 column volumes (25mL). After a achieving a stable baseline via in-line absorbance  
29 measured at 280nm, cell lysate was loaded onto into the column at a rate of 2 mL/min. An extra 2  
30 column volumes of buffer A are used to wash the column (bound with his-tagged protein) from  
31 impurities until a stable baseline is once again achieved. His-tagged protein is eluted from the  
32 column at a rate of 5 mL/min using elution buffer B (100 mM MOPS, 500 mM NaCl, 500 mM  
33 imidazole, pH 7.4) and fractions were collected corresponding to A280 peaks. Purity of purified  
34 proteins was confirmed via SDS-Page. Size exclusion chromatography using a HiPrep 26/10  
35 desalting column (Cytiva) was done on the NGC system to exchange buffer for storage buffer  
36 consisting of 50 mM Mops + 100 mM NaCl pH 7.5 according to the manufacturer’s protocols  
37 before long-term storage at -80 °C.

38  
39 **CBM-GFP pull down binding assay:** CBM-GFP pull down binding assays were performed  
40 following protocols similar to those described in previous work from our lab<sup>44,46</sup>. All binding  
41 assays were performed with six replicates and carried out in 0.2 mL 96-well round bottom  
42 microplates (Greiner Bio-One) with crystalline cellulose (Avicel PH-101) prepared as a 100 g/L  
43 slurry serving as the cellulose model substrate to screen CBM binding. Protein dilutions were made  
44 in 10mM sodium acetate buffer (pH 5.5) for concentrations ranging from 25 to 500 µg/mL.  
45 Binding wells consisted of 1 mg total cellulose, bovine serum albumin (BSA) blocking buffer (10  
46 mg/mL BSA + 40 mM sodium acetate pH 5.5), CBM- GFP dilutions, and DI water to top the

*DeChellis et al. Supercharging cellulases to enhance thermostability and catalytic activity*

1 reaction volume off to 200  $\mu$ L. Shaken standards and never shaken standards were prepared  
2 following a similar composition without any added cellulose. Binding wells and shaken standards  
3 were incubated at 25  $^{\circ}$ C with 5 RPM end over end mixing in a VWR hybridization oven for one  
4 hour while never shaken standards were incubated on the lab bench. After incubation, microplates  
5 were centrifuged at 3,900 RPM in an Eppendorf 5810R centrifuge for 5 mins to settle cellulose.  
6 Results were obtained by carefully transferring 100  $\mu$ L of supernatant to black 96-well flat bottom  
7 plates (VWR), and fluorescence was measured at 480 nm excitation and 512 nm emission with a  
8 495 nm cutoff.

9  
10 **Cellulose and biomass hydrolysis assays:** Purified enzyme activity was screened using both  
11 AFEX corn stover and crystalline cellulose-I slurries as described earlier. Reactions were  
12 conducted in 0.2 mL round bottom microplates (Greiner Bio-one) at a constant enzyme loading of  
13 120 nmol cellulase / g of substrate. Either 80  $\mu$ L of AFEX slurry (25 g/L) or 20  $\mu$ L of cellulose-I  
14 slurry (100 g/L) was used so that a total 2 mg of substrate was present in each well. Reactions were  
15 composed of either substrate slurry, 50  $\mu$ L of cellulase dilution (for 120 nmol/g loading), 20  $\mu$ L of  
16 buffer (1 M sodium acetate or sodium phosphate) at a pH within the range of 4.5 – 7.0, and DI  
17 water to adjust the final volume to 200  $\mu$ L DI water. Cellulase dilutions were replaced with 50  $\mu$ L  
18 of DI water for reaction blanks. Microplates were capped with TPE capmat-96 (Micronic) green  
19 plate seals and taped tightly with packing tape on all edges to prevent evaporation. Reaction wells  
20 were incubated for 24 hours at 60  $^{\circ}$ C in a VWR hybridization oven with end-over-end mixing at 5  
21 RPM. Microplates were centrifuged to settle solids after incubation so that reducing sugar  
22 concentration could be estimated via DNS assay in the manner described earlier.

23  
24 **Thermal stability assays:** Hydrolysis assays were conducted at higher temperatures on both  
25 soluble substrate pNPC and insoluble cellulose-I to gauge how supercharging impacted activity at  
26 elevated temperatures. Biomass was not used for these experiments as results would be convoluted  
27 due to the presence of both soluble xylan and insoluble cellulose in the substrate mixture. Reactions  
28 with pNPC were adapted from conducted in 0.2 mL PCR tubes (USA Scientific) and reaction  
29 mixtures based on previous protocols<sup>47</sup> contained 80  $\mu$ L of 5 mM pNPC, 10  $\mu$ L cellulase dilution  
30 (0.2 nmol of enzyme), and 10  $\mu$ L of 0.5 M sodium acetate pH 5.5. A pH of 5.5 was chosen based  
31 on previous work that found this to be the optimal pH for *T. fusca* cellulases<sup>41</sup>. Reaction tubes were  
32 incubated for 30 minutes at a temperature within the range of 55 – 80  $^{\circ}$ C with orbital shaking at  
33 200 RPMs. Reactions were quenched with 100  $\mu$ L of 0.1 M NaOH, and reaction mixtures were  
34 added to a transparent flat bottom microplate containing 100  $\mu$ L of DI water. Absorbance of pNP  
35 was measured at 410 nm and compared to pNP standards. Assays with cellulose-I were conducted  
36 similarly to the methods described in the previous section, except hydrolysis plates were incubated  
37 at temperatures within the range of 55 – 80  $^{\circ}$ C for four hours. Reducing sugar concentration was  
38 once again estimated via DNS assay and compared to glucose standards.

39  
40 **RESULTS AND DISCUSSION**

41  
42 **Computational design of supercharged library:** Wild-type CBM2a and wild-type Cel5A carry  
43 a net charge of -4 and -2 respectively. Supercharging workflows available in Rosetta software were  
44 used to design 4 CBM2a mutants spanning a net charge range of -10 to +8 and 6 Cel5A CD mutants  
45 spanning a net charge range of -32 to +44. The four CBM designs cover an even net charge range  
46 compared to the wild type CBM, with two designs negatively supercharged (D1 (net charge: -10)

*DeChellis et al. Supercharging cellulases to enhance thermostability and catalytic activity*

1 & D2 (net charge: -8)) and two designs positively charged (D3 (net charge: +6) & D4 (net charge:  
2 +8)). The net charge increases with design number from D1 (most negative) to D4 (most positive)  
3 as shown in **Figure 1**. Similarly, the six Cel5A designs cover a net charge range of -32 to +44 with  
4 two designs negatively supercharged (D1 (net charge: -32) & D2 (net charge: -29)) and four  
5 designs positively supercharged (D3 (net charge: +11), D4 (net charge: +14), D5 (net charge: +41)  
6 and D6 (net charge: +44)). The mutations necessary to create each of these designs are summarized  
7 in **Supplementary Table T1** and **Supplementary Table T2** while the amino acid sequences for  
8 wild-type CBM2a and wild-type Cel5A can be located in the supplementary sequences excel file.

9 The net charge range chosen for each domain and the granularity of net charge sampling  
10 were decided based on the following considerations: 1. Running unconstrained simulations  
11 (without a target net charge) allows one to obtain the maximum target net charge that does not  
12 cause significant structural perturbation of the protein 2. Rosetta supercharging algorithm may  
13 predict different mutations from the AvNAPSA algorithm and hence the construction of a  
14 supercharging library with sequence diversity should feature both approaches. Hence, upon  
15 deciding the target net charge range, an attempt was made to obtain a design each with Rosetta  
16 and AvNAPSA, that possess similar net charges. For instance, D1 and D2 CBM2a are obtained  
17 using different approaches but possess net charges in close proximity (-10 and -8 respectively).

18 Altogether, including the wild type CBM and CD, there are 5 CBM constructs and 7 CD  
19 constructs. Each CBM is fused to a CD construct via flexible linker that is constant for all  
20 constructs bringing the total library size to 35 mutants. Two mutant sequences were unable to be  
21 synthesized by the JGI (WT CBM2a – D5 Cel5A and D4 CBM2a – D4 Cel5A) reducing the total  
22 library size down to 33 mutants. Constructs were received as glycerol stocks with DNA already  
23 inserted into pET45b(+), and construct validation was performed to ensure correct sequence  
24 identity by sequencing a pool of random mutants picked via random number generator. Constructs  
25 that were expressed on a large scale were additionally sequenced to confirm their identity prior to  
26 further characterization.

27  
28 **Screening of entire library based on soluble cell lysate activity:** In order to understand how  
29 well the supercharged constructs expressed as well as characterize activity on different cellulosic  
30 substrates, all 32 mutants and wild-type CBM2a-Cel5A enzymes were expressed in *E. coli* and the  
31 resulting soluble cell lysates were used for biochemical characterization. It is important to note  
32 that enzyme loading is not fixed, thus differences in activity observed may arise from a change in  
33 catalytic turnover, or from differences in expression levels. Assays using soluble chromogenic  
34 para-nitrophenyl cellobiose provide rough insight on whether or not the enzymes are expressing  
35 and if they are active (**Figure 2A**). pNPC assays show low overall activity for most constructs with  
36 the exception of three constructs containing a mutated CBM and wildtype CD. Of these, the D2  
37 CBM2a WT Cel5A construct containing a negatively supercharged CBM and D3 CBM2a – WT  
38 Cel5A construct carrying a positively supercharged CBM stand out as being more active than the  
39 wildtype enzyme (Construct 1). Interactions with soluble pNPC occur with only the Cel5A active  
40 site<sup>48</sup>, thus mutations to the CBM aren't expected to produce drastic activity changes when  
41 hydrolyzing pNPC. The increase in pNP hydrolysis for the two CBM mutants (D2 & D3;  
42 Constructs 13&20) containing wildtype Cel5A may be a result of differences in expression levels,  
43 or improvements in solubility at the pH tested occurring as a result of changing the enzyme's pI.  
44 Most other enzymes showed either zero or low activity on pNPC which at first glance implies that  
45 these enzymes are either not expressing, or not active. Results on insoluble substrates like biomass  
46 and cellulose-I indicate this is not the case. One potential cause for the low activity on pNPC may



*DeChellis et al. Supercharging cellulases to enhance thermostability and catalytic activity*

1 be due to a decrease in thermostability for many of the constructs, especially those with mutated  
2 Cel5A catalytic domains. Enzyme binding to substrate has been shown in the past to help stabilize  
3 the enzymes at elevated temperatures<sup>49</sup>. Thus, without insoluble substrate present to form a stable  
4 enzyme-substrate complex, many of the CBM2a-Cel5A variants are subject to thermal  
5 denaturation and subsequent unfolding and precipitation resulting in low activity on pNPC.  
6 Alternatively, the charged residues might be allosterically interacting with pNPC to impact activity.

7 All 32 mutants exhibit much higher activity in comparison to pNPC assays on insoluble  
8 biomass (**Figure 2B**), cellulose I (**Figure 2C**), and PASC (**Supplementary Figure 1**). Several  
9 mutants stand out as exhibiting higher activity on cellulosic substrates compared to the wildtype  
10 enzyme. In general, the greatest activity is seen when one mutant domain (either CBM or CD) is  
11 coupled with a wildtype domain. This may once again be related to expression and protein folding,  
12 with highly mutated and drastically charged species expressing poorly or misfolding compared to  
13 other mutants. From this list of constructs with one mutated domain, all four CBM mutants (D1-  
14 D4 CBM2a -WT Cel5A) and three CD mutants (WT CBM2a - D2-D4 Cel5A) have similar or  
15 greater activity on two or more insoluble substrates compared to the wildtype enzyme. Several  
16 combinatorial constructs that contain two mutated domains also showed higher activity, with most  
17 of these mutants containing the D2, D3, or D4 CD that exhibited higher standalone activity. It is  
18 important to note that improvements to activity do not appear to be additive. For example, on  
19 pretreated biomass, the D3 CBM (D3 CBM2a – WT Cel5A) and D3 CD mutant (WT CBM2a –  
20 D3 Cel5A) are the two most active constructs. Interestingly though, the combination of these two  
21 domains together (Construct 17, D3 CBM2a – D3 Cel5A) only ever produces half the activity of  
22 the wildtype enzyme at best and has a more than two-fold decrease compared to the D3 constructs  
23 with only one mutant domain. It does appear from lysate activities that supercharging only one  
24 domain is more effective at increasing hydrolysis yield on biomass and cellulose substrates, with  
25 mutations of the CBM being more effective at improving activity.

26 When comparing groups of mutants that contain the same CBM but a different CD mutant  
27 another interesting trend is observed. For some of these “sub-families”, there is a near unimodal  
28 distribution of activity for each member. This trend is readily visible for the WT CBM sub-family  
29 (Constructs 2 - 6) and D1 CBM sub-family (Constructs 28 - 33). In these groups of constructs,  
30 activity increases from one design to another until a clear peak is reached, then activity will steadily  
31 decrease for the subsequent constructs afterwards. Therefore, there appears to be a “sweet spot” or  
32 optimal net charge corresponding to each design where the activity is maximized. This phenomena  
33 resembles that of a Sabatier optimum<sup>32,33</sup> where in this case a specific net charge likely modulates  
34 binding affinity to insoluble substrates so that a specific net charge provides an intermediary  
35 binding strength in order to maximize catalytic turnover. It is likely that this optimal charge will  
36 be different for different substrates, but this is not observed through lysate screening most likely  
37 due to assay conditions. This trend loosely holds for each sub-family, where those outliers may  
38 exist because of other factors such as low expression, low solubility, low thermostability, etc.  
39 Absolute activity of all 32 mutants and wildtype CBM2a-Cel5A is summarized in **Supplementary**  
40 **Table T3** with constructs exhibiting higher activities on two or more substrates highlighted in  
41 green. These results also include a T7 Shuffle empty vector control to ensure there was no  
42 background catalytic activity being measured on any substrate from the T7 background lysate.

43  
44 **Positively charged CBMs bind cellulose with a higher affinity:** Based on our previous work<sup>30</sup>  
45 it is hypothesized that electrostatic interactions between supercharged CBMs and crystalline  
46 cellulose can significantly alter CBM binding and resulting catalytic activity of the full length

*DeChellis et al. Supercharging cellulases to enhance thermostability and catalytic activity*

1 enzymes. To elucidate the impact CBM net charge has on cellulose binding, fluorescence-based  
2 pull-down binding assays were performed for three supercharged constructs (D2-D4) and the  
3 native CBM. The most negatively charged CBM (D1 CBM2a) was omitted due to difficulties in  
4 expressing and purifying the negative GFP tagged CBM in *E. coli*. Binding data on crystalline  
5 cellulose-I for all four constructs was fit to a one-site Langmuir isotherm model ( $R^2 \geq 0.95$ ). The  
6 maximum number of binding sites ( $N_{\max}$ ) on cellulose, binding dissociation constant ( $K_d$ ), and  
7 partition coefficient ( $N_{\max}/K_d$ ) were estimated from the fits and are listed in **Table 1**. Recent work  
8 from our group has identified that GFP binding to cellulose is insignificant with roughly two orders  
9 of magnitude lower available binding sites than CBM tagged GFP<sup>50</sup>, and thus the contribution of  
10 GFP binding to cellulose has been assumed to be negligible.

11 The charge of each CBM (excluding GFP) at pH 5.5 was estimated with an online charge  
12 calculator ([protcalc.sourceforge.net/](http://protcalc.sourceforge.net/)) using the primary sequences of each construct. These  
13 charges were correlated to binding parameters for each construct (**Figure 3**) to elucidate how  
14 charge differences impact cellulose binding. There is no apparent difference in  $N_{\max}$  for the  
15 constructs tested (**Figure 3A**) suggesting that supercharging has not altered the amount of available  
16 binding sites accessed by the CBM. However, supercharging has noticeably altered the binding  
17 dissociation constant. **Figure 3B** suggests that binding affinity (approximated as the inverse of  $K_d$ )  
18 increases with CBM net charge, with the most positively charged CBM construct (D4 CBM2a)  
19 having a dissociation constant more than 3-fold lower (or 3-fold higher association constant) than  
20 the wild-type CBM. Partition coefficients for each CBM relating the amount of enzyme bound to  
21 cellulose to free enzyme in solution can be found from the slope of the linear portion of the binding  
22 curves. These linear portions have been plotted on the same axes (**Figure 3C**) to visualize how  
23 charge impacts the partition coefficient. Once again there is a direct correlation to the charge of  
24 each CBM, with the most negative CBM tested (D2 CBM2a) exhibiting the lowest partition  
25 coefficient, and the most positive (D4 CBM2a) showing the highest. These results imply that  
26 increasing positive charge on the CBM does improve binding to cellulose clearly identified by  
27 decreased dissociation constants and increased partition coefficients. This effect certainly  
28 contributes to the activity improvements observed in lysate screening for some of the positively  
29 supercharged CBM constructs, but it is not yet clear what the limit to this effect is where strong  
30 binding leads to dissociation limitations, and thus decreased activity.

31  
32 **Supercharging both CBM and CD shifts pH optimum:** The isoelectric point (pI) of proteins  
33 describing the pH where proteins have zero net charge is dictated by ionizable groups within the  
34 side chains of the primary amino acid sequence. Altering protein net charge by introducing charged  
35 amino acids has been shown to alter solubility, and can potentially shift the pH where maximum  
36 activity is observed<sup>51</sup>. The process of supercharging significantly shifts the pI of CBM2a-Cel5A  
37 mutants through the manipulation of charged amino acid residues (D, E, R, K) present on the  
38 protein's surface. To understand how this has impacted pH dependence, all four CBM mutants  
39 (supercharged CBM, wildtype CD), and the three CD mutants (wildtype CBM, mutant CD) that  
40 showed activity improvements through lysate screening (D2, D3, D4) were expressed and purified,  
41 and their activities characterized on AFEX corn stover and cellulose-I and compared to wild type  
42 CBM2a-Cel5A. The wildtype full length enzyme is expected to have an optimal pH of 5.5 based  
43 on previous work utilizing pretreated biomass and crystalline cellulose substrates<sup>41</sup>, but activity on  
44 biomass and cellulose-I (**Figure 4**) showed that this optimal pH is actually closer to pH 6.0. When  
45 comparing CBM mutant activity in the pH range of 4.5 – 7.0 on biomass, (**Figure 4A**) differences  
46 in optimal pH can be observed. For one, the negative D2 CBM mutant clearly shows greatest

*DeChellis et al. Supercharging cellulases to enhance thermostability and catalytic activity*

1 activity at pH 5.5, where it is nearly two times more active when compared to the wildtype enzyme  
2 at its pH optimum. Interestingly, the D2 CBM mutant is much more active than all other mutants  
3 and wildtype enzyme at the more acidic range of pH's tested. The other negative CBM mutant (D1  
4 CBM) does not exhibit the same behavior and shares the same optimal pH as the wildtype enzyme  
5 where it is similar, if not slightly more active, but otherwise this mutant does not provide the  
6 improvements that D2 does on biomass. The positively supercharged CBMs (D3 and D4) display  
7 peak activity past a pH of 6.0, and in this pH range are also more than two times more active  
8 compared to the wildtype enzyme. These activity improvements are likely related to the net charge  
9 of the positive mutants. Substrates containing lignin like corn stover will non-productively bind to  
10 enzymes, and this effect is stronger for positively charged enzymes<sup>29</sup>. As the pH increases and  
11 ionizable groups are deprotonated, the net charge of these constructs will become less positive,  
12 reducing the effect of non-productive binding towards lignin. Within this range, both mutants show  
13 improved activity on biomass, and the D3 CBM mutant retains this activity up to a neutral pH. On  
14 the other hand, the three CD mutants do not show nearly the same improvements on biomass  
15 (**Figure 4B**). Of the three, the negative D2 CD mutant is most active at pH 5.5 where its activity  
16 is significantly decreased compared to wildtype. The two positive CD mutants tested (D3 and D4)  
17 respond to changes in pH in a similar fashion compared to the positive CBM mutants, but at best  
18 are only equal in activity to the wildtype enzyme near neutral pH.

19 Activity screened at different pH on crystalline cellulose-I (**Figure 4C**) once again depicts  
20 that the optimal pH for wildtype CBM2a-Cel5A is closer to pH 6.0 and even at this optimum the  
21 wildtype enzyme is less active on cellulose-I compared to biomass. This low activity seems to  
22 have been significantly improved by positively supercharging the CBM domain. Both positive  
23 CBM mutants are around 2-fold more active on cellulose-I than the wildtype enzyme past pH 5.0,  
24 and the D3 CBM mutant retains this activity up to a neutral pH. A similar trend is observed for the  
25 positively supercharged CD mutants as well (**Figure 4D**), but activity improvements are not as  
26 pronounced as the two positively supercharged CBMs. Similar to previous results observed from  
27 Whithead et al. (2017)<sup>30</sup>, negatively supercharging both CBM and CD significantly reduced  
28 hydrolytic activity on crystalline cellulose. Both D1 CBM mutant and D2 CD mutant showed less  
29 activity than the wildtype enzyme, with the D2 CD mutant being virtually inactive on cellulose-I  
30 at every pH. These interactions, both favorable and unfavorable, can be attributed to electrostatic  
31 interactions between charged enzyme and the negatively charged cellulose substrate. For the  
32 positively supercharged mutants, supercharging increases activity on cellulose due to favorable  
33 coulombic attraction with the negative substrate surface, whereas negatively supercharged mutants  
34 exhibit lower activity due to poorer binding to cellulose arising from electrostatic repulsion with  
35 the cellulose surface. These trends can be manipulated by the addition of salt (**Supplementary**  
36 **Figure 4A**) where adding NaCl to screen charges decreases activity on cellulose for positive  
37 mutants near their pH optimum and improves activity for negative mutants near their optimum.  
38 The D2 CBM mutant is an exception to this trend and behaves as an outlier at pH 5.5. At every  
39 other pH tested, the D2 CBM mutant showed similar or lower activity than wildtype, but a sharp  
40 peak in activity occurs at pH 5.5 where it is nearly 2.5-fold more active than the wildtype. The  
41 cause for this improvement only at the optimal pH is not totally clear. There still appear to be  
42 unfavorable interactions occurring between the negatively charged enzyme and cellulose substrate  
43 as this activity is even further improved by screening charges with the addition of salt to nearly a  
44 5-fold increase in activity compared to wildtype (**Supplementary Figure 4B**). One hypothesis is  
45 that the negative charges introduced on the D2 CBM mutant, while detrimental to adsorption,  
46 increase enzyme desorption or reduce non-productive binding to cellulose<sup>44</sup>. Below the pH

*DeChellis et al. Supercharging cellulases to enhance thermostability and catalytic activity*

1 optimum desorption is less favorable due to a low negative charge, and past the pH optimum  
2 adsorption is significantly hindered by high negative charges. The D2 CBM mutant differs from  
3 the D1 mutant by only two mutations that are adjacent to two planar aromatic residues. These  
4 mutations may further limit adsorption to cellulose by electrostatic repulsion, explaining why the  
5 D1 CBM mutant does not experience similar activity improvements. Homology modelling of the  
6 supercharged CBM constructs (**Supplementary Figure 5**) indicates changes in tertiary structure  
7 for each CBM mutant, along with the orientation of their planar aromatic amino acid residues that  
8 dictate binding to cellulose. These changes may have resulted in changes to the CBM structure-  
9 function, but this is beyond the scope of this current work.

10  
11 **Peak catalytic activity observed is correlated to net charge:** Changing the solution pH in which  
12 the enzymes are characterized subsequently changes the enzyme's net charge. Using the amino  
13 acid sequence for each construct, the net charge was calculated using online tools at each pH value  
14 tested in the previous section. These results were correlated to the measured enzyme activity to  
15 understand the impact that net charge has on activity on both biomass and cellulose-I for the  
16 wildtype, CBM mutants, and CD mutants. **Figure 5** depicts that on both substrates there appears  
17 to be a net charge where optimal activity is observed, and these peaks are different on either  
18 substrate. In the case of AFEX corn stover (**Figure 5A**), the highest activity occurs at a net charge  
19 of around -10, with majority of the constructs screened in the range from 0 to -20 showing  
20 moderate to high activity. There seems to be a good correlation between different constructs, with  
21 both wildtype and CBM mutants peaking at around the same net charge, and both CBM and CD  
22 mutants have similar activity at similar net charges. It is interesting to note that the three purified  
23 CD constructs never showed much activity on biomass, and none of these constructs were near the  
24 net charge peak when screened on biomass. Results on cellulose-I (**Figure 5B**) show a much tighter  
25 relationship with a near unimodal distribution corresponding to a peak in activity around a slight  
26 positive charge of 5. Once again there is good correlation across all three groups of constructs,  
27 with the wildtype nearly matching activity of CBM mutants at negative net charges. Results on  
28 both substrates report that net charge is a good predictor of enzyme activity on different substrates,  
29 but different substrates require different optimal charges. For substrates containing lignin such as  
30 lignocellulose biomass (e.g., corn stover), it is clearly beneficial to have negatively charged  
31 enzymes in order to ease lignin inhibition. On the other hand, for cellulosic substrates that contain  
32 no lignin and slight negative surface charges (cellulose-I), it is more favorable to have slight  
33 negative charges to improve adsorption through coulombic attraction. However, net charge does  
34 not appear to be the sole predictor of enzyme activity. When the wildtype enzyme reaches the peak  
35 net charge (+5) on cellulose I, it is nearly inactive. Similarly, although the CD mutant activity  
36 peaks in this same charge range, they are still not as active as the CBM mutant. Therefore, while  
37 altering net charge is effective at modifying activity and optimizing performance for different  
38 substrates, it is not the only factor controlling changes in catalytic activity.

39  
40 **Positively supercharged CBMs show increased optimal temperature on cellulose:** Assays run  
41 on pNPC and cellulose-I were incubated at elevated temperatures to understand how supercharging  
42 impacted enzyme stability (**Figure 6**). AFEX corn stover was omitted from these assays as results  
43 would be convoluted due to the presence of soluble hemicellulose in the biomass matrix. Aside  
44 from the negatively supercharged D2 CD mutant, all enzymes exhibit optimal activity on pNPC at  
45 65 °C (**Figure 6A**). This is a drastic difference from the temperature used for lysate screening on  
46 pNPC (50°C) that was chosen based on previous protocols analyzing cellulase activity on soluble



*DeChellis et al. Supercharging cellulases to enhance thermostability and catalytic activity*

1 substrates<sup>52</sup>. At this temperature optimum, the wildtype, D2 CBM construct, and D3 CD construct  
2 are roughly equal in activity confirmed by student's T-test p-values (**Supplementary Table T6**).  
3 There does not appear to be any correlation between engineering of the CBM or CD, or any  
4 preference to positive or negative supercharging. At 70°C it is evident that there is not much of an  
5 improvement to thermostability, as the wildtype enzyme still retains 90% activity at this point  
6 while the mutants lose more than 20% of their optimal activity. However, results on cellulose-I  
7 (**Figure 6B**) demonstrate that the two positively supercharged CBMs are more tolerant to high  
8 temperatures in the presence of insoluble substrate. Both D3 and D4 CBM mutants show a five-  
9 degree higher optimal temperature (65°C) than all other constructs including the wildtype where  
10 cellulose hydrolysis is increased 1.5-fold. Additionally, the D3 CBM mutant has nearly the same  
11 activity at 70°C as the wildtype does at its temperature optimum (60°C) indicating a nearly 10-  
12 degree increase in thermostability in the presence of substrate. Both mutants remain more active  
13 than the wildtype up to 75°C further displaying their stability. To further examine the impact of  
14 this improved thermostability, both CBM mutants and wildtype enzyme were incubated with  
15 cellulose at 65°C for longer time frames (**Figure 6C**). Some variations in later timepoints can be  
16 observed, likely due to issues related to evaporation losses when incubating at longer times and  
17 higher temperatures. Both the wildtype enzyme and D4 CBM mutant seems to nearly level off  
18 after 6 hrs of hydrolysis with a 2-fold difference in activity between the two constructs and  
19 wildtype enzyme. However, the D3 CBM mutant seems to remain active past this point, and after  
20 72 hours, it was shown to release 2.5-fold more glucose than the wildtype enzyme by nature of its  
21 improved thermostability at the elevated temperature optimum. Substrate stabilization of enzymes  
22 at higher temperatures has been recorded in the past<sup>49,53,54</sup>, and in this scenario it can be  
23 hypothesized that the favorable surface charged interactions between the negative substrate and  
24 positive binding modules seems to even further increase this stabilization resulting in improved  
25 thermotolerance, and a resulting increase in turnover due to the higher temperature.

26  
27 **Combing improved supercharged domains does not lead to additive improvements:**  
28 Biochemical assays with purified enzymes identify three CBM designs (D2, D3, D4) and two CD  
29 designs (D3, D4) that, when coupled with a wildtype domain, showed either improved  
30 thermostability or higher catalytic activity than the wildtype full length enzyme. Of the six possible  
31 chimeras produced by combining an improved CBM and CD, two constructs showed lower  
32 activities in lysate screening (D3 CBM2a – D3 Cel5A & D2 CBM2a – D4 Cel5A), and one was  
33 not synthesized (D4 CBM2a – D4 Cel5A). The remaining constructs (D2 CBM2a – D3 Cel5A,  
34 D3 CBM3a – D4 Cel5A, D4 CBM2a – D3 Cel5A) were expressed, purified, and characterized in  
35 a similar manner as the CBM and CD mutant constructs described in the previous sections. In  
36 order to deconvolute the impact of combining two supercharged domains, combinatorial mutant  
37 activity was screened at different pH on pretreated biomass (**Figure 7 A-C**) and crystalline  
38 cellulose (**Figure 7 D-F**). In nearly every case, activity of the combinatorial mutants is constrained  
39 by the activity of the individual CBM or CD mutant; there is no additive increase in activity when  
40 combing two mutated domains. In scenarios where the individual CBM and CD mutants shared  
41 similar optimal pH, the combinatorial mutant had similar activity to either one of the individual  
42 mutants. This is evident for both D4 CBM2a – D3 Cel5A and D3 CBM2a – D4 Cel5A which both  
43 contain two positively supercharged domains. Screening individual CBM mutants and CD mutants  
44 in the previous section showed greater improvements to overall activity when only the CBM was  
45 mutated with upwards of a twofold difference in activity between CBM mutants and CD mutants  
46 on biomass. This low biomass activity for the mutated Cel5A domains significantly dampens

*DeChellis et al. Supercharging cellulases to enhance thermostability and catalytic activity*

1 combinatorial mutant activity on pretreated biomass, eliminating the activity improvements  
2 observed when the CBM mutant alone was mutated. On crystalline cellulose, both positively  
3 supercharged combinatorial mutants show activities either between that of the individual mutants,  
4 or below them. Once again, it appears that supercharging only the CBM provides greater  
5 contributions to improving catalytic performance. At pH values past 5.5 all positively  
6 supercharged constructs are more active than the wildtype enzyme, but once again constructs with  
7 only a positively supercharged CBM (D3 and D4) and a wildtype Cel5A CD still remain the most  
8 active across a span of solution conditions.

9 When combining two oppositely supercharged domains as is the case in the third  
10 combinatorial construct D2 CBM2a – D3 Cel5A, activity is almost completely killed. On biomass,  
11 the D2 CBM2a – D3 Cel5A mutant displays low activity similar to its positively supercharged D3  
12 CD. Even though the D2 CBM mutant was the most active individual construct on biomass,  
13 combination with the positively supercharged D3 CD led to upwards of 2-fold reductions in  
14 activity. This effect is even more drastic on crystalline cellulose, and on this substrate the  
15 combinatorial mutant shows little to no activity. There seems to be little synergism between the  
16 negatively charged CBM and positively charged CD. Both individual mutants have different  
17 ionization points, and different optimal pH where they are most active, translating to a  
18 combinatorial mutant with poor stability and activity. There is also the possibility for unfavorable  
19 intramolecular electrostatic interactions between oppositely charged domains that may perturb  
20 orientation of the CBM binding face and Cel5A active site with substrate. These effects were not  
21 observed in cell lysate assays likely due to the high concentration of salt and stabilizers like  
22 glycerol in the lysis buffer that would help keep the protein stable and screen unfavorable charged  
23 interactions. All purified enzyme assays reported utilized a minimal amount of salt in order to  
24 prevent charge screening that can mask interactions that result from supercharging.

## 25 CONCLUSION

26 In this work we have successfully supercharged a family-5 endoglucanase Cel5A and its native  
27 family-2a carbohydrate binding module from the thermophilic microbe *Thermobifida fusca* in  
28 order to change surface charged interactions between enzyme and substrate. A total library size of  
29 33 mutant constructs was created from computational CBM and CD designs with non-natural net  
30 charges. Characterization of soluble cell lysates for all 33 mutants and purified enzymes resulted  
31 in the following key conclusions: (i) hydrolytic activity is correlated with enzyme surface charge,  
32 (ii) supercharging only the CBM is more effective at improving catalytic activity, (iii) the optimal  
33 pH for biomass hydrolysis can be shifted through supercharging, and (iv) positive supercharging  
34 of the CBM can be used to improve thermostability in presence of cellulosic substrate. In addition  
35 to these conclusions, three key constructs were identified as being more active than the wildtype  
36 full length enzyme: (i) D2 CBM2a – WT Cel5A, (ii) D3 CBM2a – WT Cel5A, and (iii) D4 CBM2a  
37 – WT Cel5A. This is the first reported work in the field that has been able to successfully utilize  
38 supercharging approach to improve activity on both pretreated biomass and crystalline cellulose.

39 The three key CBM construct created in this work with better catalytic performance than  
40 the wildtype enzyme bare important outcomes with regards to sustainability and implementation  
41 into industrial biorefineries. The cost of using inefficient CAZymes in industrial biorefineries  
42 significantly limits the economic viability of biofuel production. The improved CBM constructs  
43 that show up to a 2-fold reduction in enzyme loading can result in up to a \$0.57 reduction in cost  
44 per gallon of ethanol<sup>20</sup> at normal processing temperatures. For the two positively supercharged  
45 CBM mutants with elevated optimal temperatures, even greater improvements to hydrolysis yield  
46 can translate to further economic cost reduction for final products. Lastly, modified pH optima for

*DeChellis et al. Supercharging cellulases to enhance thermostability and catalytic activity*

1 different CBM2a – Cel5A mutants has implications for fine-tuning biofuel processing conditions  
2 using either yeast that require acidic medium (pH 4.0 to 6.0)<sup>55</sup> or bacteria like *E. coli* which require  
3 more neutral conditions<sup>56</sup>.

4 The effect of shifting enzyme surface charge closely resembles volcano plots used to find  
5 a Sabatier optimum when correlating activity to binding affinity<sup>32–34</sup>. In this scenario, results from  
6 previous studies<sup>29,30</sup> as well as this current work suggest that enzyme binding to crystalline  
7 cellulose and cellulosic substrates is highly dependent on enzyme net charge. Utilizing GFP based  
8 pull-down binding assays we have shown that manipulating surface charge via protein  
9 supercharging can alter the binding affinity for these enzymes. Correlating these net charges to the  
10 activity for purified enzymes elucidates optimal net charges where activity peaks resembling a  
11 Sabatier optimum similar to those observed for cellulases in previous studies. The complex nature  
12 of substrate, as well as multifaceted interactions between solubilized enzyme and insoluble  
13 substrate limits net charge from being a one-dimensional predictor of binding affinity and  
14 improved activity. This can be observed when comparing optimal net charges between biomass  
15 and crystalline cellulose. There is clearly a benefit to positively supercharging enzymes to facilitate  
16 binding to a slightly negatively charged substrate like cellulose, but with a more complex substrate  
17 like lignocellulosic biomass that contains lignin and soluble xylan, the net charge optimum shifts  
18 and favors negative charges. Still with lignin present, positively charged CBM constructs showed  
19 improved activity on biomass at neutral pH's likely due to the greater contribution to activity from  
20 the improved binding to cellulose by nature of their positive charges. This effect can be extended  
21 when analyzing activity at elevated temperatures, where both positively supercharged mutants  
22 exhibit elevated temperature optimums again due to their improved interactions with cellulose.  
23 Many of these trends do not hold for the peculiar D2 CBM2a – WT Cel5A construct. With a  
24 negatively supercharged CBM, this mutant exhibited improved biomass hydrolysis across a range  
25 of pH, as well as unexpectedly high activity on crystalline cellulose in a narrow pH range. This  
26 behavior seems to be the only outlier when comparing net charge to activity, and the cause for  
27 these improvements isn't fully understood. It is likely that protein supercharging resulted in some  
28 structural anomalies that may alter the structure-function relationship of this mutant. These  
29 changes in overall structure may be impacting the overall solution stability, as well as normal CBM  
30 function such as how the planar aromatic residues align with glucopyranose rings within the  
31 dextran chain, substrate channeling into the Cel5A active site, adsorption to cellulose, desorption  
32 from cellulose, or penetration into the bulk substrate<sup>26,57,58</sup>. Elucidating the source for these  
33 improvements and understanding how supercharging may have altered the overall CBM  
34 architecture will require more detailed characterization in future work.

35  
36 **ACKNOWLEDGEMENTS**

37 This study was primarily supported by NSF CBET awards (1604421 and 1846797). ADC was  
38 supported by the Biotechnology Training Program fellowship that was funded by Rutgers  
39 University and the National Institute of General Medical Sciences of the National Institutes of  
40 Health under award number T32 GM135141. All genes used for expression of recombinant  
41 constructs were provided by the Department of Energy Joint Genome Institute (DOE-JGI)  
42 supported by the Community Science Program Gene Synthesis Award (CSP-503631 Syn). Finally,  
43 we would like to also thank Professor Rebecca Garlock-Ong (MTU) and Professor Bruce Dale  
44 (MSU) for kindly providing access to AFEX treated corn stover used in this study.

*DeChellis et al. Supercharging cellulases to enhance thermostability and catalytic activity*

1

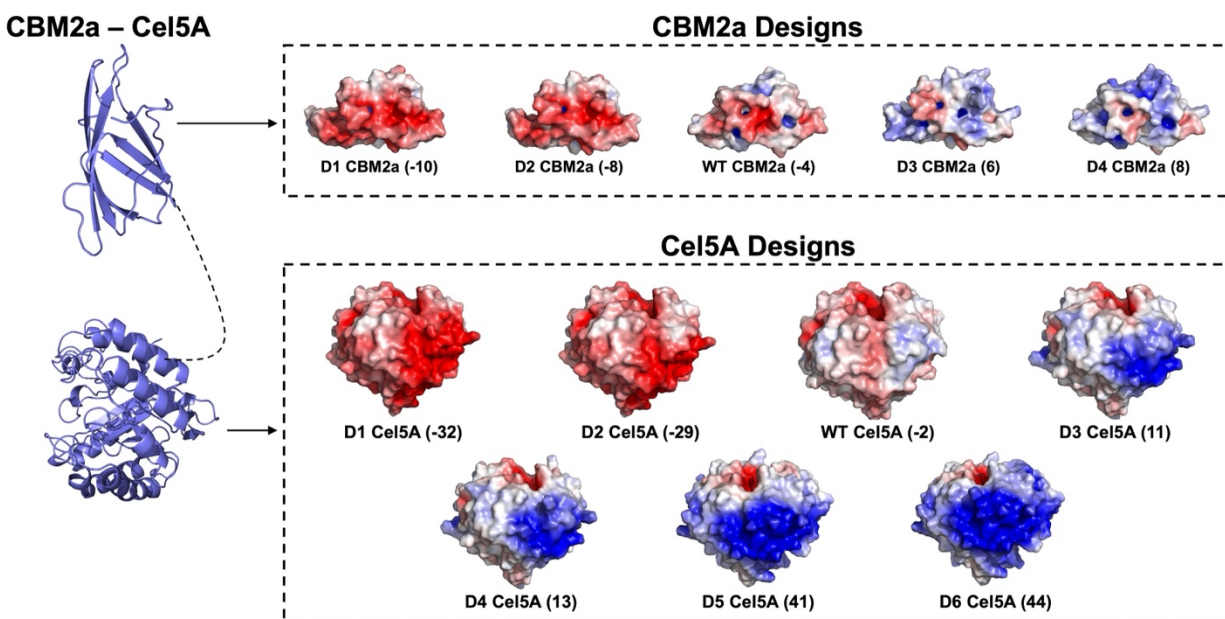

2 **Figure 1. Computational design of CBM2a and Cel5A mutants and library construction.** Rosetta macromolecular software  
3 was used to identify surface amino acid residues on the surface of either CBM2a or Cel5a for mutation to positively charged (K,  
4 R) or negatively charged (D, E) amino acids. Each domain was mutated individually then one of five CBM designs was fused with  
5 one of seven Cel5A CD designs via a flexible linker peptide creating a total possible library size of 35 mutants. Net charges for  
6 each design or wildtype domain (WT) are indicated in parenthesis and were estimated by the total number of charged amino acid  
7 residues. Electrostatic potential maps ranging from -5 kT/e (red) to +5 kT/e (blue) were generated using Adaptive Poisson –  
8 Boltzman Solver (APBS) plugin in PyMOL.

9  
10  
11  
12  
13  
14  
15  
16  
17  
18  
19  
20  
21  
22  
23  
24  
25  
26  
27  
28  
29  
30  
31  
32  
33



*DeChellis et al. Supercharging cellulases to enhance thermostability and catalytic activity*

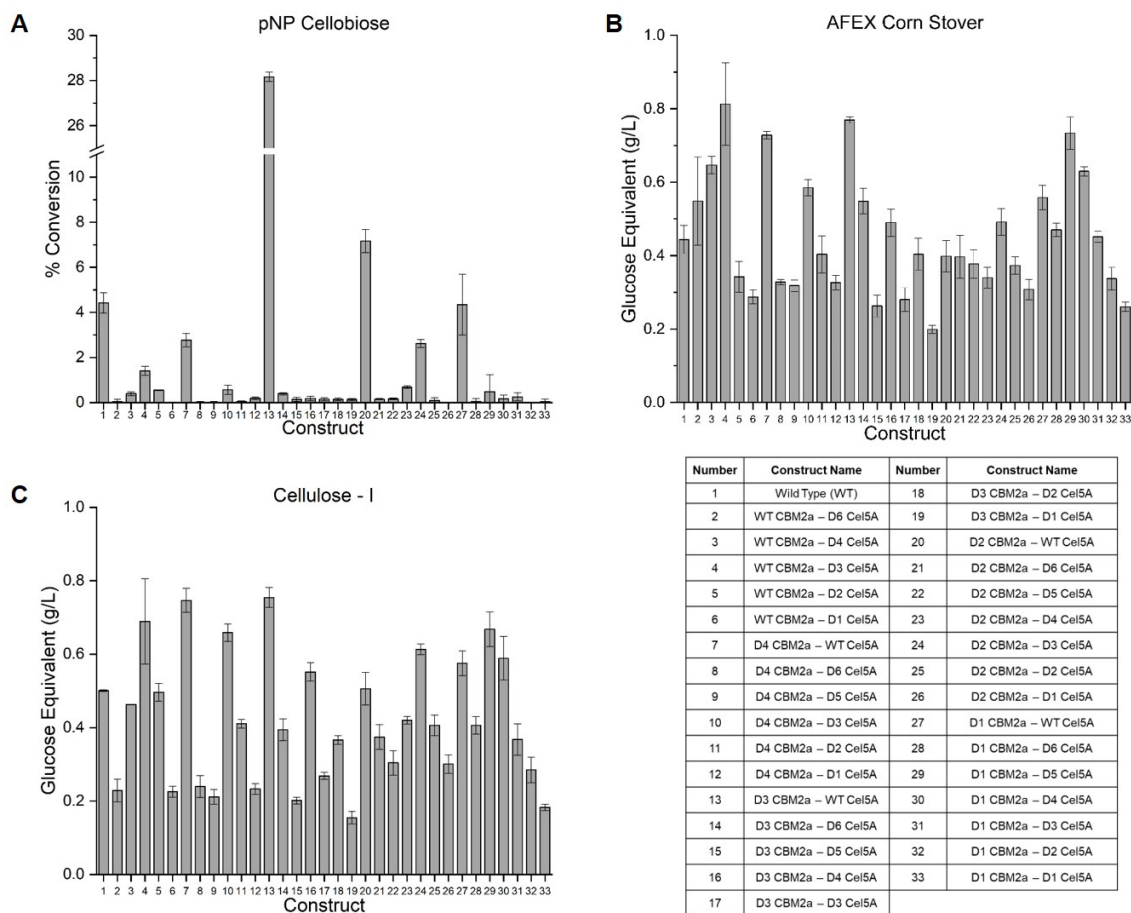

1 **Figure 2. Screening soluble cell lysates for entire library identifies several CBM2a – Cel5A mutant constructs with higher**  
 2 **catalytic activity than wildtype full length enzyme.** All 33 constructs depicted were expressed as 200mL auto-induction cultures  
 3 and pellets harvested via centrifugation were sonicated in buffer containing 20 mM sodium phosphate pH 7.4, 500 mL sodium  
 4 chloride, and 20% (v/v) glycerol. (A) Para-nitrophenyl cellobiose (pNPC) was used to characterize soluble substrate activity by  
 5 incubating 100  $\mu$ L of isolated soluble cell lysate with 5mM pNPC for 30 mins at 50°C before quenching with sodium hydroxide.  
 6 Absorbance at 410nm was used to estimate the percent of pNPC converted to yellow-colored paranitrophenol (pNP) by comparing  
 7 to pNP standards. (B) Amonia fiber expansion pretreated (AFEX) cornstover was prepared as a 25 g/L slurry in DI water and 100  
 8  $\mu$ L of slurry was incubated with 100  $\mu$ L of soluble cell lysate for 6 hours at 60 °C. Hydrolysate supernatant was isolated via  
 9 centrifugation and reducing sugar concentration was estimated using DNS assay and compared to glucose standards. (C) Crystalline  
 10 Cellulose – I was prepared from Avicel PH – 101 as a 100 g/L slurry and incubated with 100 $\mu$ L soluble cell lysate for 6 hours at  
 11 60 °C. Hydrolysate supernatant was obtained via centrifugation, and DNS assay was used to estimate reducing sugar concentration  
 12 in the hydrolysis supernatant. All data points represent the average of four technical replicates and error bars represent one standard  
 13 deviation.

14  
15  
16

DeChellis et al. Supercharging cellulases to enhance thermostability and catalytic activity

1

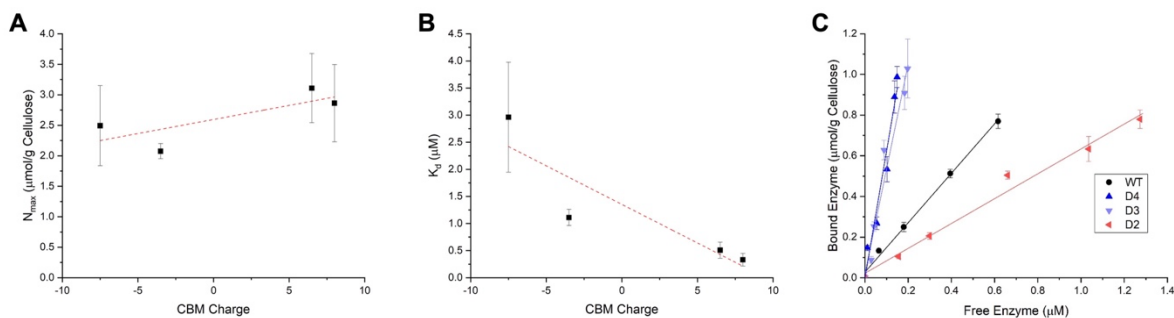

2

3 **Figure 3. Supercharging does not impact  $N_{max}$ , but significantly alters binding affinity and partition coefficient on cellulose-**

4 **I.** GFP tagged constructs were expressed as 1L auto-induction cultures, and N-terminus his-tagged enzymes were purified from *E.*

5 *coli* lysate by immobilized metal affinity chromatography. Pull down binding assays were performed with a total 1 mg insoluble

6 cellulose, 2.5 mg/mL BSA, 10 mM NaOAc pH 5.5, and protein dilutions ranging from 25 – 500  $\mu\text{g/mL}$  made using NaOAc buffer.

7 Cellulose was replaced with DI water for shaken and never shaken standards prepared alongside binding wells. All plates were

8 incubated for one hour at 25 °C with binding wells and shaken standards being mixed end-over-end at 5 RPM, and never shaken

9 standards kept on the lab bench. After incubation all plates were centrifuged at 3,900 RPM, and 100  $\mu\text{L}$  of supernatant was

10 transferred to opaque flat bottom microplates to measure fluorescence at 480 excitation and 512 emissions with 495 nm cutoff. Full

11 scale binding curves presented in the supplementary information were constructed using Origin plotting software and data was fit

12 to a one-site Langmuir isotherm model. (A) Maximum number of binding sites ( $N_{max}$ ) on cellulose resulting from one-site model

13 fit for all four CBM-GFP constructs plotted as a function of the corresponding CBM charge. CBM charge refers to the charge of

14 the binding module only and was estimated using the primary amino acid sequence for each CBM using an online protein charge

15 calculator (<https://protcalc.sourceforge.net/>). (B) Binding dissociation constant ( $K_d$ ) found from one-site model fits for all four

16 CBM constructs plotted as a function of CBM charge. (C) Linear portion of binding curves for all four constructs tested. The slope

17 of these plots corresponds to the partition coefficient for each CBM construct which can be defined as ( $N_{max}/K_d$ ). All data reported

18 represents the average of six technical replicates, and error bars represent standard deviation from the mean.

19

*DeChellis et al. Supercharging cellulases to enhance thermostability and catalytic activity*

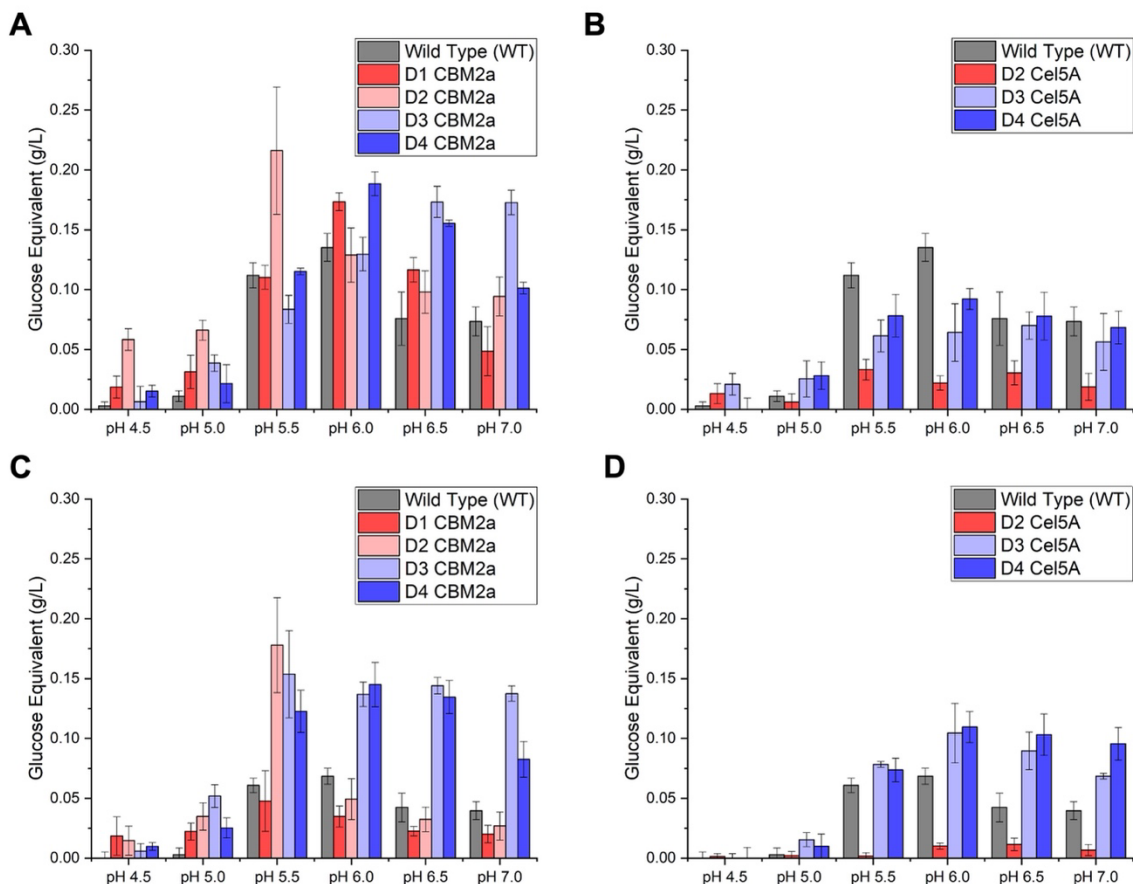

1 **Figure 4. Catalytic activity of purified single mutant domains is highly substrate and pH dependent with large activity**  
2 **improvements observed in positively supercharged domains on crystalline Cellulose – I.** Enzymes were expressed as 1L auto-  
3 induction cultures, and N-terminus his-tagged enzymes were purified from *E. coli* lysate by immobilized metal affinity  
4 chromatography. Purified enzyme assays conducted with insoluble substrate slurries consisted of 120 nmol enzyme per gram of  
5 substrate with a total 2mg of substrate per reaction mixture. Enzyme assays were conducted in buffers ranging in pH from 4.5 –  
6 7.0 and were incubated 24 hours at 60°C. All dilutions were made in deionized water and the minimal amount of salt was added in  
7 order to observe full effects of net charge unabated by charge screening. Reducing sugar equivalents were estimated via DNS assay  
8 and compared to glucose standards. All mutants shown are color coded from most negative (red) to most positive (blue). (A)  
9 Glucose equivalents released after 24-hour AFEX cornstover hydrolysis for wildtype full length enzyme and four CBM2a mutant  
10 constructs. All five enzymes tested are full length containing the native wildtype Cel5A. (B) Glucose equivalents released after 24-  
11 hour AFEX cornstover hydrolysis for wildtype enzyme and three Cel5A CD mutant constructs. All four enzymes tested are full  
12 length containing the native wildtype CBM2a domain. (C) Glucose equivalents released after 24-hour crystalline cellulose – I  
13 hydrolysis for the wildtype enzyme and four CBM2a mutant constructs. All five enzymes tested are full length containing the  
14 native wildtype Cel5A catalytic domain. (D) Glucose equivalents released after 24-hour crystalline cellulose-I hydrolysis for  
15 wildtype enzyme and three Cel5A CD mutants. All four enzymes tested are full length containing the native wildtype CBM2a  
16 binding module. All data reported represents the average of four technical replicates, and error bars represent standard deviation  
17 from the mean.  
18

*DeChellis et al. Supercharging cellulases to enhance thermostability and catalytic activity*

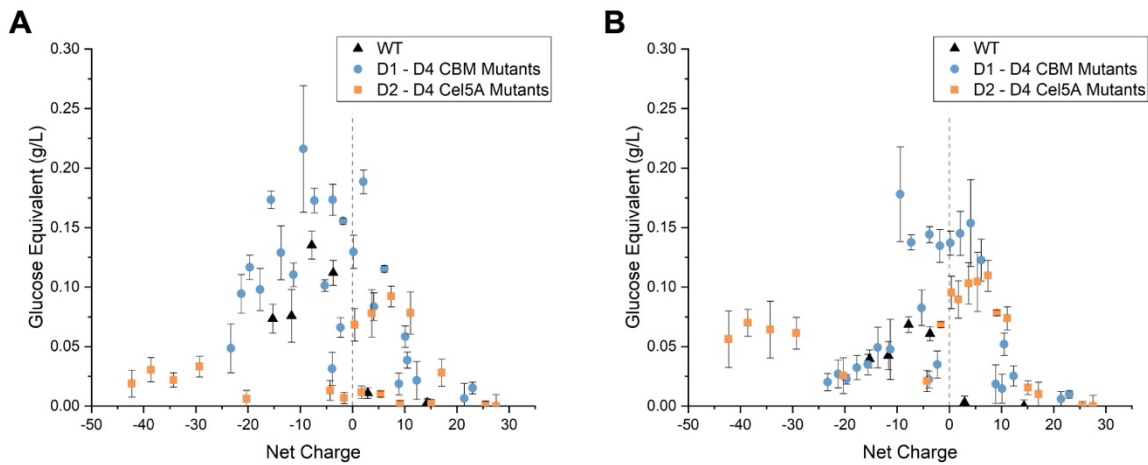

1 **Figure 5. Enhanced catalytic activity correlates to overall net charge in a substrate dependent relationship.** Enzyme activity  
2 from pH screening assays was adapted and plotted as a function of full-length net charge. Enzyme net charge was calculated at  
3 each pH tested from Figure 3 based on full length enzyme sequences. The grey dashed line designates the origin where net charge  
4 is zero. (A) Glucose equivalents from AFEX hydrolysis correlated to full length enzyme net charge for wildtype full length enzyme  
5 (black triangles), all four CBM mutans (blue circles; Fig 3A), and three Cel5A mutants (orange square; Fig3B). (B) Glucose  
6 equivalents from cellulose-I hydrolysis correlated to full length enzyme net charge for wildtype full length enzyme (black triangles),  
7 all four CBM mutans (blue circles; Fig 3C), and three Cel5A mutants (orange square; Fig3D). All data points are averages of four  
8 technical replicates and error bars represent standard deviation from the mean. Net charge based on the enzyme sequences were  
9 estimated using an online charge calculator (<https://protcalc.sourceforge.net/>).  
10  
11  
12  
13  
14  
15  
16  
17  
18  
19  
20  
21  
22  
23  
24  
25  
26  
27  
28  
29  
30



*DeChellis et al. Supercharging cellulases to enhance thermostability and catalytic activity*

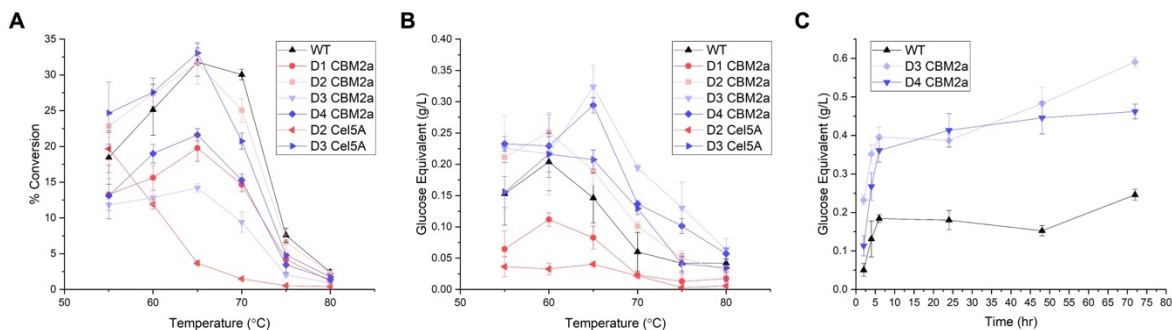

1 **Figure 6. Supercharging enhances optimal hydrolysis temperature for D3 and D4 CBM2a constructs (WT Cel5A) in the**  
2 **presence of cellulosic substrates.** (A) Percent conversion of pNPC to pNP as a function of incubation for wildtype enzyme, all  
3 four CBM2a mutants (WT Cel5A), one negative, and one positive Cel5A CD mutant (WT CBM2a). Hydrolysis reactions consisted  
4 5mM pNPC stock hydrolyzed by a total of 0.2nmol of enzyme. Reaction mixtures were incubated for 30 mins at the temperature  
5 designated on the x-axis, and reactions were quenched with sodium hydroxide after incubation. The concentration of yellow colored  
6 pNP released was estimated using absorbance values measured at 410 nm and comparison to pNP standards ranging in  
7 concentration from 0 to 5 mM. (B) Glucose equivalents as a function of incubation temperature yielded after hydrolysis of cellulose-  
8 I with wildtype enzyme, all four CBM2a mutants (WT Cel5A), one negative, and one positive Cel5A CD mutant (WT CBM2a). A  
9 total of 4mg of cellulose-I prepared as a 100 g/L slurry from Avicel PH-101 was incubated with a total enzyme loading of 120nmol/g  
10 for four hours at the temperatures indicated on the x-axis. Reducing sugar concentration in the soluble hydrolysate was estimated  
11 via DNS reducing sugar assay and glucose equivalents quantified from glucose standards. (C) Based on the data reported from (B),  
12 the two best performing mutants (D3 CBM2a – WT Cel5A and D4 CBM2a – WT Cel5A) which exhibited a higher overall optimal  
13 temperature were examined at this new optimum. A total of 4mg of cellulose- I was incubated at the inflated temperature optimum  
14 (65 °C) with 120 nmol enzyme per gram of substrate for longer time periods up to 72 hours. Data was recorded by removing  
15 hydrolysis reactions from their incubators and holding at -20 °C to arrest the reaction at the time points designated on the x-axis.  
16 Reducing sugar concentration was estimated via DNS reducing sugar assay and compared to glucose standards. All data reported  
17 represents the average of four technical replicates and error bars represent standard deviation from the mean.

18  
19  
20  
21  
22  
23  
24  
25  
26  
27  
28  
29  
30  
31  
32  
33  
34

*DeChellis et al. Supercharging cellulases to enhance thermostability and catalytic activity*

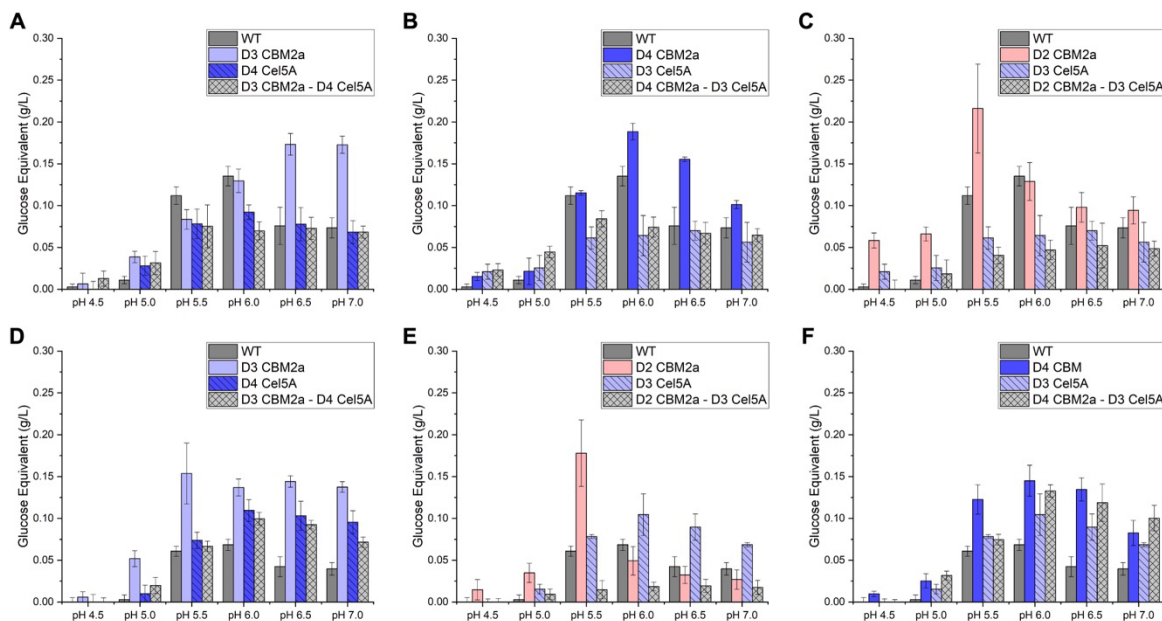

1 **Figure 7. Combining two mutated domains does not lead to an additive improvement in catalytic activity.** Combinatorial  
2 mutants comprising of the best performing CBM2a or Cel5A designs were expressed as 1L auto-induction cultures, and N-terminus  
3 his-tagged enzymes were purified from *E. coli* lysate by immobilized metal affinity chromatography. Purified enzyme assays  
4 conducted with insoluble substrate slurries consisted of 120 nmol enzyme per gram of substrate with a total 2mg of substrate per  
5 reaction mixture. Enzyme assays were conducted in buffers ranging in pH from 4.5 – 7.0 and were incubated 24 hours at 60°C. All  
6 dilutions were made in deionized water and the minimal amount of salt was added in order to observe full effects of net charge  
7 unabated by charge screening. Reducing sugar equivalents were estimated via DNS assay and compared to glucose standards.  
8 Combinatorial mutants (light grey) are plotted alongside the wildtype enzyme (grey), and single mutant counterparts that were  
9 combined together for comparison. All single domain mutants shown are color coded from most negative (red) to most positive  
10 (blue). Data reported represents the average of four technical replicates, and error bars represent standard deviation from the mean.  
11 (A) Glucose equivalents released after AFEX cornstover hydrolysis for D3 CBM2a – D4 Cel5A combinatorial mutant. (B) Glucose  
12 equivalents released after AFEX cornstover hydrolysis for D4 CBM2a – D3 Cel5A combinatorial mutant. (C) Glucose equivalents  
13 released after AFEX cornstover hydrolysis for D2 CBM2a – D3 Cel5A combinatorial mutant. (D) Glucose equivalents released  
14 after crystalline cellulose - I hydrolysis for D3 CBM2a – D4 Cel5A combinatorial mutant. (E) Glucose equivalents released after  
15 crystalline cellulose - I hydrolysis for D4 CBM2a – D3 Cel5A combinatorial mutant. (F) Glucose equivalents released after  
16 crystalline cellulose – I hydrolysis for D2 CBM2a – D3 Cel5A combinatorial mutant.

17  
18  
19  
20  
21  
22  
23  
24  
25

*DeChellis et al. Supercharging cellulases to enhance thermostability and catalytic activity*

1

| Construct | CBM Charge (pH 5.5) | $N_{\max}$ ( $\mu\text{mol/g}$ Cellulose) | $K_d$ ( $\mu\text{M}$ ) | $N_{\max}/K_d$ (L/g Cellulose) |
|-----------|---------------------|-------------------------------------------|-------------------------|--------------------------------|
| D4 CBM2a  | 8                   | $2.86 \pm 0.63$                           | $0.33 \pm 0.12$         | $8.64 \pm 0.41$                |
| D3 CBM2a  | 6.5                 | $3.11 \pm 0.57$                           | $0.51 \pm 0.15$         | $6.11 \pm 0.35$                |
| WT CBM2a  | -3.5                | $2.08 \pm 0.12$                           | $1.11 \pm 0.15$         | $1.87 \pm 0.15$                |
| D2 CBM2a  | -7.5                | $2.49 \pm 0.65$                           | $2.96 \pm 1.01$         | $0.84 \pm 0.43$                |

2 **Table 1. Binding parameters for wild-type and supercharged CBMs from Langmuir one-site isotherm.** CBM charge at pH  
3 5.5 refers to the charge of only the CBM. Binding parameters  $N_{\max}$  and  $K_d$ , along with their respective standard deviation was  
4 obtained by fitting pull-down binding assay data to a Langmuir one-site model in Origin software. Partition coefficient ( $N_{\max}/K_d$ )  
5 was obtained by dividing the model parameters in columns three and four.

6

7

8

9

10

11

12

13

14

15

16

17

18

19

20

21

22

23

24

25

26

27

28

29

30

31

32

33

34

35

36

37

38

39

1 **REFERENCES**

- 2
- 3 (1) Brandt, A. R.; Millard-Ball, A.; Ganser, M.; Gorelick, S. M. Peak Oil Demand: The Role  
4 of Fuel Efficiency and Alternative Fuels in a Global Oil Production Decline. *Environ. Sci.*  
5 *Technol.* **2013**, *47* (14). <https://doi.org/10.1021/es401419t>.
- 6 (2) Nizami, A. S.; Rehan, M.; Waqas, M.; Naqvi, M.; Ouda, O. K. M.; Shahzad, K.; Miandad,  
7 R.; Khan, M. Z.; Syamsiro, M.; Ismail, I. M. I.; Pant, D. Waste Biorefineries: Enabling  
8 Circular Economies in Developing Countries. *Bioresource Technology*. 2017.  
9 <https://doi.org/10.1016/j.biortech.2017.05.097>.
- 10 (3) Leong, H. Y.; Chang, C. K.; Khoo, K. S.; Chew, K. W.; Chia, S. R.; Lim, J. W.; Chang, J.  
11 S.; Show, P. L. Waste Biorefinery towards a Sustainable Circular Bioeconomy: A  
12 Solution to Global Issues. *Biotechnology for Biofuels*. 2021.  
13 <https://doi.org/10.1186/s13068-021-01939-5>.
- 14 (4) Rajesh Banu, J.; Preethi; Kavitha, S.; Tyagi, V. K.; Gunasekaran, M.; Karthikeyan, O. P.;  
15 Kumar, G. Lignocellulosic Biomass Based Biorefinery: A Successful Platform towards  
16 Circular Bioeconomy. *Fuel* **2021**, *302*. <https://doi.org/10.1016/j.fuel.2021.121086>.
- 17 (5) Ragauskas, A. J.; Williams, C. K.; Davison, B. H.; Britovsek, G.; Cairney, J.; Eckert, C.  
18 A.; Frederick, W. J.; Hallett, J. P.; Leak, D. J.; Liotta, C. L.; Mielenz, J. R.; Murphy, R.;  
19 Templer, R.; Tschaplinski, T. The Path Forward for Biofuels and Biomaterials. *Science*.  
20 2006. <https://doi.org/10.1126/science.1114736>.
- 21 (6) Pacala, S.; Socolow, R. Stabilization Wedges: Solving the Climate Problem for the next  
22 50 Years with Current Technologies. *Science*. 2004.  
23 <https://doi.org/10.1126/science.1100103>.
- 24 (7) Perin, G.; Jones, P. R. Economic Feasibility and Long-Term Sustainability Criteria on the  
25 Path to Enable a Transition from Fossil Fuels to Biofuels. *Current Opinion in*  
26 *Biotechnology*. 2019. <https://doi.org/10.1016/j.copbio.2019.04.004>.
- 27 (8) Tuck, C. O.; Pérez, E.; Horváth, I. T.; Sheldon, R. A.; Poliakoff, M. Valorization of  
28 Biomass: Deriving More Value from Waste. *Science*. 2012, pp 695–699.  
29 <https://doi.org/10.1126/science.1218930>.
- 30 (9) Ubando, A. T.; Felix, C. B.; Chen, W. H. Biorefineries in Circular Bioeconomy: A  
31 Comprehensive Review. *Bioresource Technology*. 2020.  
32 <https://doi.org/10.1016/j.biortech.2019.122585>.
- 33 (10) Somerville, C.; Youngs, H.; Taylor, C.; Davis, S. C.; Long, S. P. Feedstocks for  
34 Lignocellulosic Biofuels. *Science*. 2010. <https://doi.org/10.1126/science.1189268>.
- 35 (11) Somerville, C.; Bauer, S.; Brininstool, G.; Facette, M.; Hamann, T.; Milne, J.; Osborne,  
36 E.; Paredes, A.; Persson, S.; Raab, T.; Vorwerk, S.; Youngs, H. Toward a Systems  
37 Approach to Understanding Plant Cell Walls. *Science*. 2004.  
38 <https://doi.org/10.1126/science.1102765>.
- 39 (12) Chundawat, S. P. S.; Beckham, G. T.; Himmel, M. E.; Dale, B. E. Deconstruction of  
40 Lignocellulosic Biomass to Fuels and Chemicals. *Annu. Rev. Chem. Biomol. Eng* **2011**, *2*,  
41 121–145. <https://doi.org/10.1146/annurev-chembioeng-061010-114205>.
- 42 (13) Payne, C. M.; Knott, B. C.; Mayes, H. B.; Hansson, H.; Himmel, M. E.; Sandgren, M.;  
43 Ståhlberg, J.; Beckham, G. T. Fungal Cellulases. *Chemical Reviews*. 2015.  
44 <https://doi.org/10.1021/cr500351c>.
- 45 (14) Lombard, V.; Golaconda Ramulu, H.; Drula, E.; Coutinho, P. M.; Henrissat, B. The  
46 Carbohydrate-Active Enzymes Database (CAZy) in 2013. *Nucleic Acids Res.* **2014**, *42*

*DeChellis et al. Supercharging cellulases to enhance thermostability and catalytic activity*

- 1 (D1), 490–495. <https://doi.org/10.1093/nar/gkt1178>.
- 2 (15) Glasgow, E.; Vander Meulen, K.; Kuch, N.; Fox, B. G. Multifunctional Cellulases Are  
3 Potent, Versatile Tools for a Renewable Bioeconomy. *Current Opinion in Biotechnology*.  
4 2021. <https://doi.org/10.1016/j.copbio.2020.12.020>.
- 5 (16) Himmel, M. E.; Ding, S. Y.; Johnson, D. K.; Adney, W. S.; Nimlos, M. R.; Brady, J. W.;  
6 Foust, T. D. Biomass Recalcitrance: Engineering Plants and Enzymes for Biofuels  
7 Production. *Science*. 2007. <https://doi.org/10.1126/science.1137016>.
- 8 (17) Jeoh, T.; Ishizawa, C. I.; Davis, M. F.; Himmel, M. E.; Adney, W. S.; Johnson, D. K.  
9 Cellulase Digestibility of Pretreated Biomass Is Limited by Cellulose Accessibility.  
10 *Biotechnol. Bioeng.* **2007**, *98* (1). <https://doi.org/10.1002/bit.21408>.
- 11 (18) McCann, M. C.; Carpita, N. C. Biomass Recalcitrance: A Multi-Scale, Multi-Factor, and  
12 Conversion-Specific Property. *Journal of Experimental Botany*. 2015.  
13 <https://doi.org/10.1093/jxb/erv267>.
- 14 (19) Gao, D.; Haarmeyer, C.; Balan, V.; Whitehead, T. A.; Dale, B. E.; Chundawat, S. P. S.  
15 Lignin Triggers Irreversible Cellulase Loss during Pretreated Lignocellulosic Biomass  
16 Saccharification. *Biotechnol. Biofuels* **2014**, *7* (1). [https://doi.org/10.1186/s13068-014-](https://doi.org/10.1186/s13068-014-0175-x)  
17 [0175-x](https://doi.org/10.1186/s13068-014-0175-x).
- 18 (20) Klein-Marcuschamer, D.; Oleskowicz-Popiel, P.; Simmons, B. A.; Blanch, H. W. The  
19 Challenge of Enzyme Cost in the Production of Lignocellulosic Biofuels. *Biotechnol.*  
20 *Bioeng.* **2012**, *109* (4). <https://doi.org/10.1002/bit.24370>.
- 21 (21) Galbe, M.; Wallberg, O. Pretreatment for Biorefineries: A Review of Common Methods  
22 for Efficient Utilisation of Lignocellulosic Materials. *Biotechnology for Biofuels*. 2019.  
23 <https://doi.org/10.1186/s13068-019-1634-1>.
- 24 (22) Rastogi, M.; Shrivastava, S. Recent Advances in Second Generation Bioethanol  
25 Production: An Insight to Pretreatment, Saccharification and Fermentation Processes.  
26 *Renewable and Sustainable Energy Reviews*. 2017.  
27 <https://doi.org/10.1016/j.rser.2017.05.225>.
- 28 (23) Balan, V.; Bals, B.; Chundawat, S. P. S.; Marshall, D.; Dale, B. E. Lignocellulosic  
29 Biomass Pretreatment Using AFEX. *Methods in molecular biology (Clifton, N.J.)*. 2009.  
30 [https://doi.org/10.1007/978-1-60761-214-8\\_5](https://doi.org/10.1007/978-1-60761-214-8_5).
- 31 (24) Da Costa Sousa, L.; Jin, M.; Chundawat, S. P. S.; Bokade, V.; Tang, X.; Azarpira, A.; Lu,  
32 F.; Avci, U.; Humpula, J.; Uppugundla, N.; Gunawan, C.; Pattathil, S.; Cheh, A. M.;  
33 Kothari, N.; Kumar, R.; Ralph, J.; Hahn, M. G.; Wyman, C. E.; Singh, S.; Simmons, B.  
34 A.; Dale, B. E.; Balan, V. Next-Generation Ammonia Pretreatment Enhances Cellulosic  
35 Biofuel Production. *Energy Environ. Sci.* **2016**, *9* (4). <https://doi.org/10.1039/c5ee03051j>.
- 36 (25) Zeng, Y.; Zhao, S.; Yang, S.; Ding, S. Y. Lignin Plays a Negative Role in the Biochemical  
37 Process for Producing Lignocellulosic Biofuels. *Current Opinion in Biotechnology*. 2014.  
38 <https://doi.org/10.1016/j.copbio.2013.09.008>.
- 39 (26) Shoseyov, O.; Shani, Z.; Levy, I. Carbohydrate Binding Modules: Biochemical Properties  
40 and Novel Applications. *Microbiol. Mol. Biol. Rev.* **2006**, *70* (2).  
41 <https://doi.org/10.1128/mnbr.00028-05>.
- 42 (27) Chundawat, S. P. S.; Beckham, G. T.; Himmel, M.; Dale, B. E. Deconstruction of  
43 Lignocellulosic Biomass to Fuels and Chemicals. *Annu. Rev. Chem. Biomol. Eng.* **2011**, *2*,  
44 121–145. <https://doi.org/10.1146/annurev-chembioeng-061010-114205>.
- 45 (28) Katsimpouras, C.; Stephanopoulos, G. Enzymes in Biotechnology: Critical Platform  
46 Technologies for Bioprocess Development. *Current Opinion in Biotechnology*. 2021.



*DeChellis et al. Supercharging cellulases to enhance thermostability and catalytic activity*

- 1 <https://doi.org/10.1016/j.copbio.2020.12.003>.
- 2 (29) Haarmeyer, C. N.; Smith, M. D.; Chundawat, S. P. S.; Sammond, D.; Whitehead, T. A.  
3 Insights into Cellulase-Lignin Non-Specific Binding Revealed by Computational  
4 Redesign of the Surface of Green Fluorescent Protein. *Biotechnol. Bioeng.* **2017**, *114* (4).  
5 <https://doi.org/10.1002/bit.26201>.
- 6 (30) Whitehead, T. A.; Bandi, C. K.; Berger, M.; Park, J.; Chundawat, S. P. S. Negatively  
7 Supercharging Cellulases Render Them Lignin-Resistant. *ACS Sustain. Chem. Eng.* **2017**,  
8 *5* (7). <https://doi.org/10.1021/acssuschemeng.7b01202>.
- 9 (31) Lawrence, M. S.; Phillips, K. J.; Liu, D. R. Supercharging Proteins Can Impart Unusual  
10 Resilience. *J. Am. Chem. Soc.* **2007**, *129* (33). <https://doi.org/10.1021/ja071641y>.
- 11 (32) Sabatier, P. Hydrogénations et Déshydrogénations Par Catalyse. *Berichte der Dtsch.*  
12 *Chem. Gesellschaft* **1911**, *44* (3), 1984–2001.  
13 <https://doi.org/10.1002/CBER.19110440303>.
- 14 (33) Kari, J.; Olsen, J. P.; Jensen, K.; Badino, S. F.; Krogh, K. B. R. M.; Borch, K.; Westh, P.  
15 Sabatier Principle for Interfacial (Heterogeneous) Enzyme Catalysis. *ACS Catal.* **2018**, *8*  
16 (12), 11966–11972. <https://doi.org/10.1021/acscatal.8b03547>.
- 17 (34) S. Schaller, K.; Avelar Molina, G.; Kari, J.; Schiano-di-Cola, C.; Holst Sørensen, T.;  
18 Borch, K.; H.J. Peters, G.; Westh, P. Virtual Bioprospecting of Interfacial Enzymes:  
19 Relating Sequence and Kinetics. *ACS Catal.* **2022**, *12* (12), 7427–7435.  
20 <https://doi.org/10.1021/acscatal.2c02305>.
- 21 (35) Wilson, D. B. Studies of Thermobifida Fusca Plant Cell Wall Degrading Enzymes. *Chem.*  
22 *Rec.* **2004**, *4* (2). <https://doi.org/10.1002/tcr.20002>.
- 23 (36) Gomez Del Pulgar, E. M.; Saadeddin, A. The Cellulolytic System of Thermobifida Fusca.  
24 *Critical Reviews in Microbiology.* 2014. <https://doi.org/10.3109/1040841X.2013.776512>.
- 25 (37) Chundawat, S. P. S.; Bellesia, G.; Uppugundla, N.; Sousa, L.; Gao, D.; Cheh, A.;  
26 Agarwal, U.; Bianchetti, C.; Phillips, G.; Langan, P.; Balan, V.; Gnanakaran, S.; Dale, B.  
27 E. Restructuring the Crystalline Cellulose Hydrogen Bond Network Enhances Its  
28 Depolymerization Rate. *J. Am. Chem. Soc.* **2011**, *133* (29), 11163–11174.  
29 <https://doi.org/10.1021/ja2011115>.
- 30 (38) Song, Y.; Dimaio, F.; Wang, R. Y. R.; Kim, D.; Miles, C.; Brunette, T.; Thompson, J.;  
31 Baker, D. High-Resolution Comparative Modeling with RosettaCM. *Structure* **2013**, *21*  
32 (10), 1735–1742. <https://doi.org/10.1016/J.STR.2013.08.005>.
- 33 (39) Der, B. S.; Kluwe, C.; Miklos, A. E.; Jacak, R.; Lyskov, S.; Gray, J. J.; Georgiou, G.;  
34 Ellington, A. D.; Kuhlman, B. Alternative Computational Protocols for Supercharging  
35 Protein Surfaces for Reversible Unfolding and Retention of Stability. **2013**.  
36 <https://doi.org/10.1371/journal.pone.0064363>.
- 37 (40) Studier, F. W. Protein Production by Auto-Induction in High Density Shaking Cultures.  
38 *Protein Expr. Purif.* **2005**, *41* (1), 207–234. <https://doi.org/10.1016/J.PEP.2005.01.016>.
- 39 (41) Liu, Y.; Nemmaru, B.; Chundawat, S. P. S. Thermobifida fusca Cellulases Exhibit  
40 Increased Endo–Exo Synergistic Activity, but Lower Exocellulase Activity, on Cellulose-  
41 III. **2020**. <https://doi.org/10.1021/acssuschemeng.9b06792>.
- 42 (42) Miller, G. L. Use of Dinitrosalicylic Acid Reagent for Determination of Reducing Sugar.  
43 *Anal. Chem.* **1959**, *31* (3). <https://doi.org/10.1021/ac60147a030>.
- 44 (43) Gao, D.; Chundawat, S. P. S.; Sethi, A.; Balan, V.; Gnanakaran, S.; Dale, B. E. Increased  
45 Enzyme Binding to Substrate Is Not Necessary for More Efficient Cellulose Hydrolysis.  
46 *Proc. Natl. Acad. Sci. U. S. A.* **2013**, *110* (27). <https://doi.org/10.1073/pnas.1213426110>.

*DeChellis et al. Supercharging cellulases to enhance thermostability and catalytic activity*

- 1 (44) Chundawat, S. P. S.; Nemmaru, B.; Hackl, M.; Brady, S. K.; Hilton, M. A.; Johnson, M.  
2 M.; Chang, S.; Lang, M. J.; Huh, H.; Lee, S. H.; Yarbrough, J. M.; López, C. A.;  
3 Gnanakaran, S. Molecular Origins of Reduced Activity and Binding Commitment of  
4 Processive Cellulases and Associated Carbohydrate-Binding Proteins to Cellulose III. *J.*  
5 *Biol. Chem.* **2021**, *296*. <https://doi.org/10.1016/j.jbc.2021.100431>.
- 6 (45) Stevenson, J.; Krycer, J. R.; Phan, L.; Brown, A. J. A Practical Comparison of Ligation-  
7 Independent Cloning Techniques. *PLoS One* **2013**, *8* (12).  
8 <https://doi.org/10.1371/journal.pone.0083888>.
- 9 (46) Nemmaru, B.; Ramirez, N.; Farino, C. J.; Yarbrough, J. M.; Kravchenko, N.; Chundawat,  
10 S. P. S. Reduced Type-A Carbohydrate-Binding Module Interactions to Cellulose I Leads  
11 to Improved Endocellulase Activity. *Biotechnol. Bioeng.* **2021**, *118* (3).  
12 <https://doi.org/10.1002/bit.27637>.
- 13 (47) Gao, D.; Chundawat, S. P. S.; Krishnan, C.; Balan, V.; Dale, B. E. Mixture Optimization  
14 of Six Core Glycosyl Hydrolases for Maximizing Saccharification of Ammonia Fiber  
15 Expansion (AFEX) Pretreated Corn Stover. *Bioresour. Technol.* **2010**, *101* (8), 2770–  
16 2781. <https://doi.org/10.1016/J.BIORTECH.2009.10.056>.
- 17 (48) Dingee, J. W.; Anton, A. B. The Kinetics of P-Nitrophenyl- $\beta$ -d-Cellobioside Hydrolysis  
18 and Transglycosylation by *Thermobifida Fusca* Cel5AcD. *Carbohydr. Res.* **2010**, *345* (17),  
19 2507–2515. <https://doi.org/10.1016/J.CARRES.2010.09.011>.
- 20 (49) Boer, H.; Koivula, A. The Relationship between Thermal Stability and PH Optimum  
21 Studied with Wild-Type and Mutant *Trichoderma Reesei* Cellobiohydrolase Cel7A.  
22 <https://doi.org/10.1046/j.1432-1033.2003.03431.x>.
- 23 (50) Jayachandran, D.; Smith, P.; Irfan, M.; Sun, J.; Yarborough, J. M.; Bomble, Y. J.; Lam,  
24 E.; Chundawat, S. P. S. Engineering and Characterization of Carbohydrate-binding  
25 Modules for Imaging Cellulose Fibrils Biosynthesis in Plant Protoplasts. *Biotechnol.*  
26 *Bioeng.* **2023**. <https://doi.org/10.1002/BIT.28484>.
- 27 (51) Shaw, K. L.; Grimsley, G. R.; Yakovlev, G. I.; Makarov, A. A.; Pace, A. C. N. The Effect  
28 of Net Charge on the Solubility, Activity, and Stability of Ribonuclease Sa. **2001**.  
29 <https://doi.org/10.1110/ps.440101>.
- 30 (52) Gao, D.; Chundawat, S. P. S.; Liu, T.; Hermanson, S.; Gowda, K.; Brumm, P.; Dale, B.  
31 E.; Balan, V. Strategy for Identification of Novel Fungal and Bacterial Glycosyl  
32 Hydrolase Hybrid Mixtures That Can Efficiently Saccharify Pretreated Lignocellulosic  
33 Biomass. *Bioenergy Res.* **2010**, *3* (1). <https://doi.org/10.1007/s12155-009-9066-6>.
- 34 (53) Voutilainen, S. P.; Boer, H.; Alapuranen, M.; Jänis, J.; Vehmaanperä, J.; Koivula, A.  
35 Improving the Thermostability and Activity of *Melanocarpus Albomyces*  
36 Cellobiohydrolase Cel7B. <https://doi.org/10.1007/s00253-008-1848-9>.
- 37 (54) Voutilainen, S. P.; Boer, H.; Linder, M. B.; Puranen, T.; Rouvinen, J.; Vehmaanperä, J.;  
38 Koivula, A. Heterologous Expression of *Melanocarpus Albomyces* Cellobiohydrolase  
39 Cel7B, and Random Mutagenesis to Improve Its Thermostability. *Enzyme Microb.*  
40 *Technol.* **2007**, *41* (3), 234–243. <https://doi.org/10.1016/J.ENZMICTEC.2007.01.015>.
- 41 (55) Narendranath, N. V.; Power, R. Relationship between PH and Medium Dissolved Solids in  
42 Terms of Growth and Metabolism of *Lactobacilli* and *Saccharomyces Cerevisiae* during  
43 Ethanol Production. *Appl. Environ. Microbiol.* **2005**, *71* (5), 2239–2243.  
44 <https://doi.org/10.1128/AEM.71.5.2239-2243.2005>.
- 45 (56) Förster, A. H.; Gescher, J. Metabolic Engineering of *Escherichia Coli* for Production of  
46 Mixed-Acid Fermentation End Products. *Frontiers in Bioengineering and Biotechnology*.

*DeChellis et al. Supercharging cellulases to enhance thermostability and catalytic activity*

- 1           2014. <https://doi.org/10.3389/fbioe.2014.00016>.
- 2 (57) Bommarius, A. S.; Sohn, M.; Kang, Y.; Lee, J. H.; Realf, M. J. Protein Engineering of  
3 Cellulases. *Current Opinion in Biotechnology*. 2014.  
4 <https://doi.org/10.1016/j.copbio.2014.04.007>.
- 5 (58) Reyes-Ortiz, V.; Heins, R. A.; Cheng, G.; Kim, E. Y.; Vernon, B. C.; Elandt, R. B.;  
6 Adams, P. D.; Sale, K. L.; Hadi, M. Z.; Simmons, B. A.; Kent, M. S.; Tullman-Ercek, D.  
7 Addition of a Carbohydrate-Binding Module Enhances Cellulase Penetration into  
8 Cellulose Substrates. *Biotechnol. Biofuels* **2013**, *6* (1). [https://doi.org/10.1186/1754-6834-](https://doi.org/10.1186/1754-6834-6-93)  
9 [6-93](https://doi.org/10.1186/1754-6834-6-93).
- 10
